# Supplementary material
Source: publisher figshare collection journal article supplement (https://acs.figshare.com/ndownloader/files/8201393)

# Recyclable Dirhodium(II) Catalyst Rh<sub>2</sub>(esp)<sub>2</sub> for the Allylic Oxidation of Δ<sup>5</sup>-Steroids

Yi Wang,<sup>†</sup> Yi Kuang,<sup>†</sup> Hongyang Zhang,<sup>†</sup> Ruocheng Ma,<sup>‡</sup> and Yuanhua Wang<sup>\*,†</sup>

<sup>†</sup>College of Chemistry, Sichuan University, Chengdu, 610064, P. R. China

<sup>‡</sup>Jiaxiang Foreign Languages School Attached To Chengdu No.7 Middle School, Chengdu, 610023, P.R.China

E-mail: yhwang@scu.edu.cn

## Supporting Information

|   |                                                                                                                                    |       |
|---|------------------------------------------------------------------------------------------------------------------------------------|-------|
| 1 | The Pictures of the Oxidation Reaction of dehydroepiandrosterone acetate <b>1a</b> Catalyzed by Rh <sub>2</sub> (esp) <sub>2</sub> | S2    |
| 2 | Catalyst Recycling Experiment                                                                                                      | S2    |
| 3 | <sup>1</sup> H and <sup>13</sup> C NMR Spectrum of Compounds                                                                       | S3-33 |

**1. The Pictures of the Oxidation Reaction of Dehydroepiandrosterone acetate **1a** Catalyzed by  $\text{Rh}_2(\text{esp})_2$  (gram scale)**

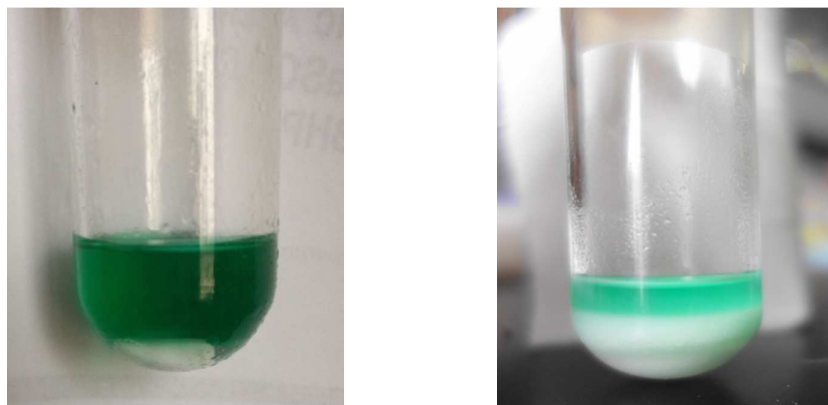

**Figure S1** Homogenous reaction mixture when the reaction start (left) and the product **2a** was precipitated when the reaction was finished (right).

**2. Catalyst Recycling Experiments.**

After the EtOAc was removed 24 mg of  $\text{Rh}_2(\text{esp})_2$  (96% recovery rate) was obtained. Catalyst recovered from the first reaction was directly added to a 2 mL of **1a** (1.1 g, 3.3 mmol) in 2 mL heptane and 5 equiv T-HYDRO in order to initiate the second oxidation. After this second reaction, the solution was cooled to 0°C, **2a** precipitated (78% yield) and 22 mg of  $\text{Rh}_2(\text{esp})_2$  complex (93% recovery rate) was recovered. This catalyst was cycled twice more according to the procedure of cycle 2. The stable  $\text{Rh}_2(\text{esp})_2$  catalyst system was found to maintain high activity and produce high yields after 5 cycles.

**Table S1.** Catalyst Recycling Experiments<sup>a</sup>

| cycle | Precipitated yield (%) | $\text{Rh}_2(\text{esp})_2$ recovery rate (%) |
|-------|------------------------|-----------------------------------------------|
| 1     | 76                     | 96                                            |
| 2     | 77                     | 93                                            |
| 3     | 74                     | 90                                            |
| 4     | 75                     | 88                                            |
| 5     | 72                     | 82                                            |

<sup>a</sup>All reactions were performed with **1a** (0.4 mmol), T-HYDRO (2 mmol), n-heptane (0.5 mL),  $\text{Rh}_2(\text{esp})_2$  (1.0 mol%).

### 3 $^1\text{H}$ and $^{13}\text{C}$ NMR Spectrum of Compounds

$^1\text{H}$  NMR of  $\text{Rh}_2(\text{esp})_2$

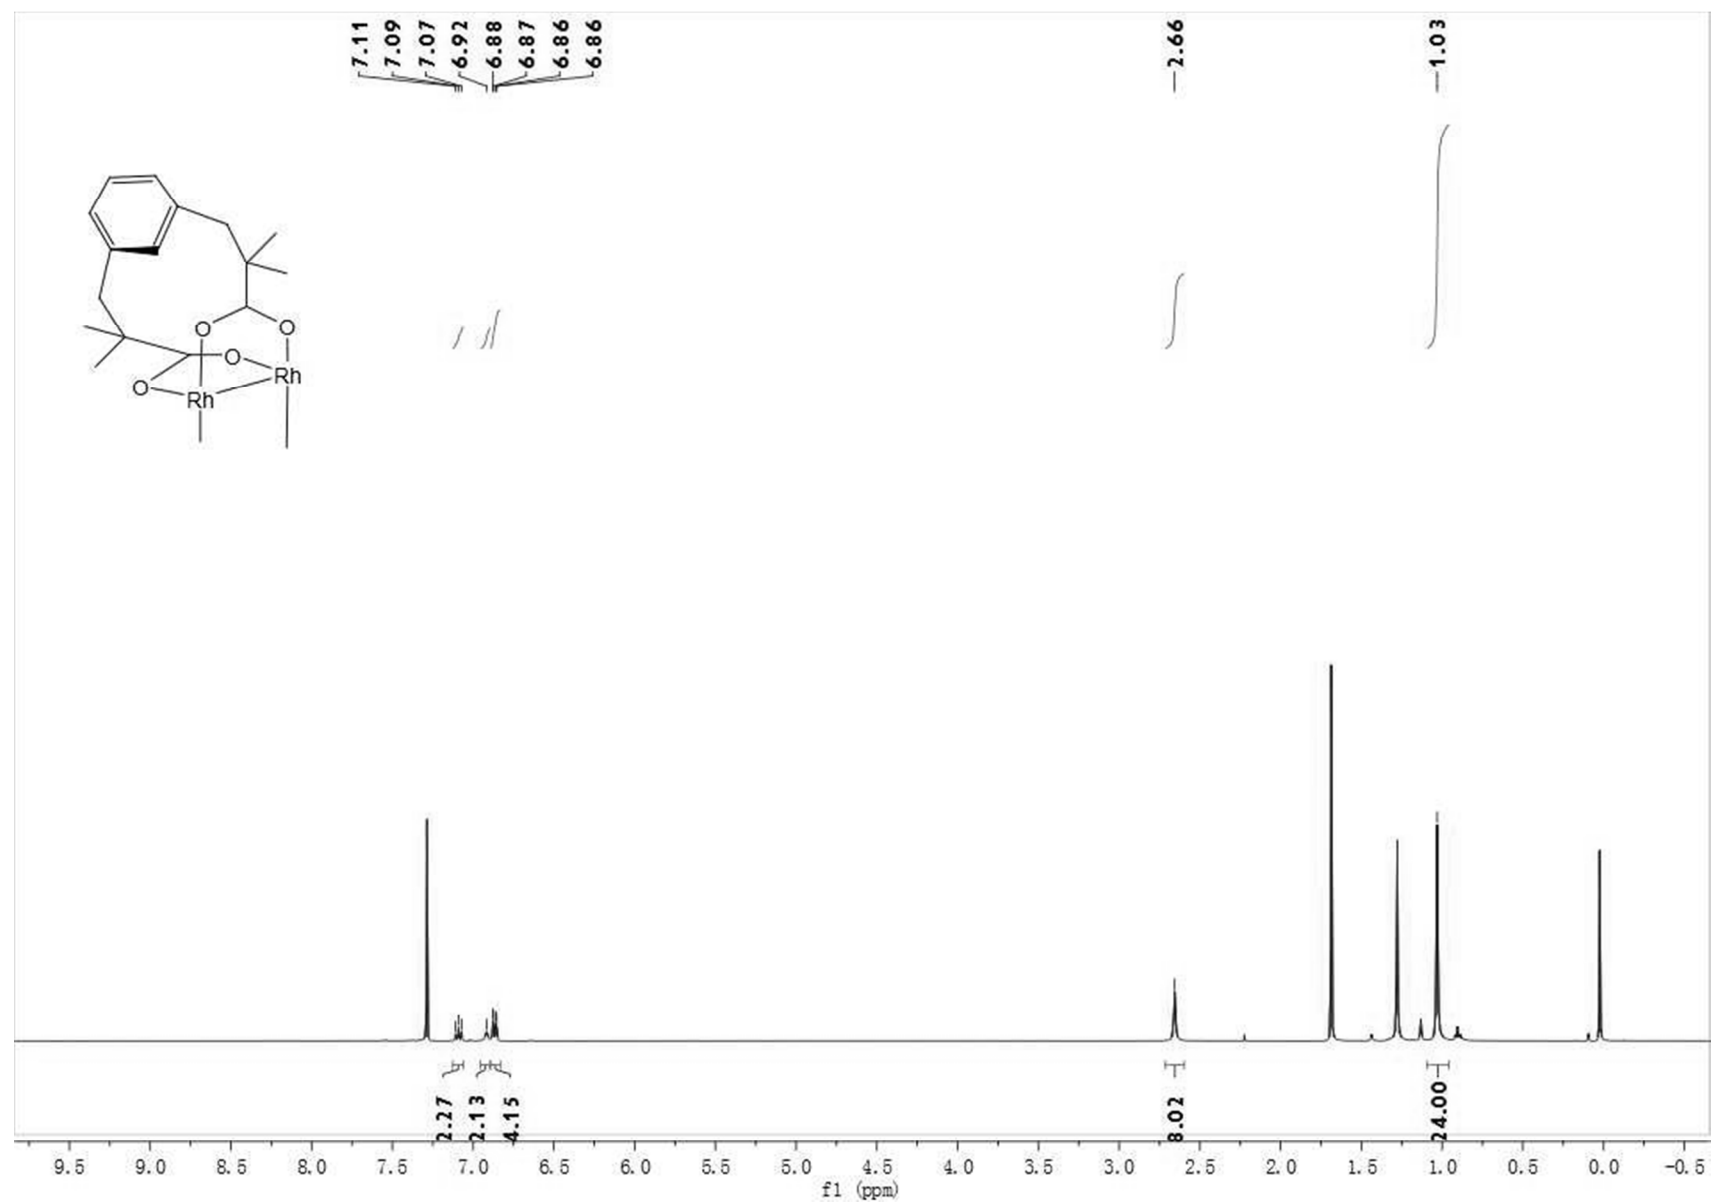

$^1\text{H}$  NMR of  $\text{Rh}_2(\text{esp})_2$  recovered by Merrifield-pyridine resin.

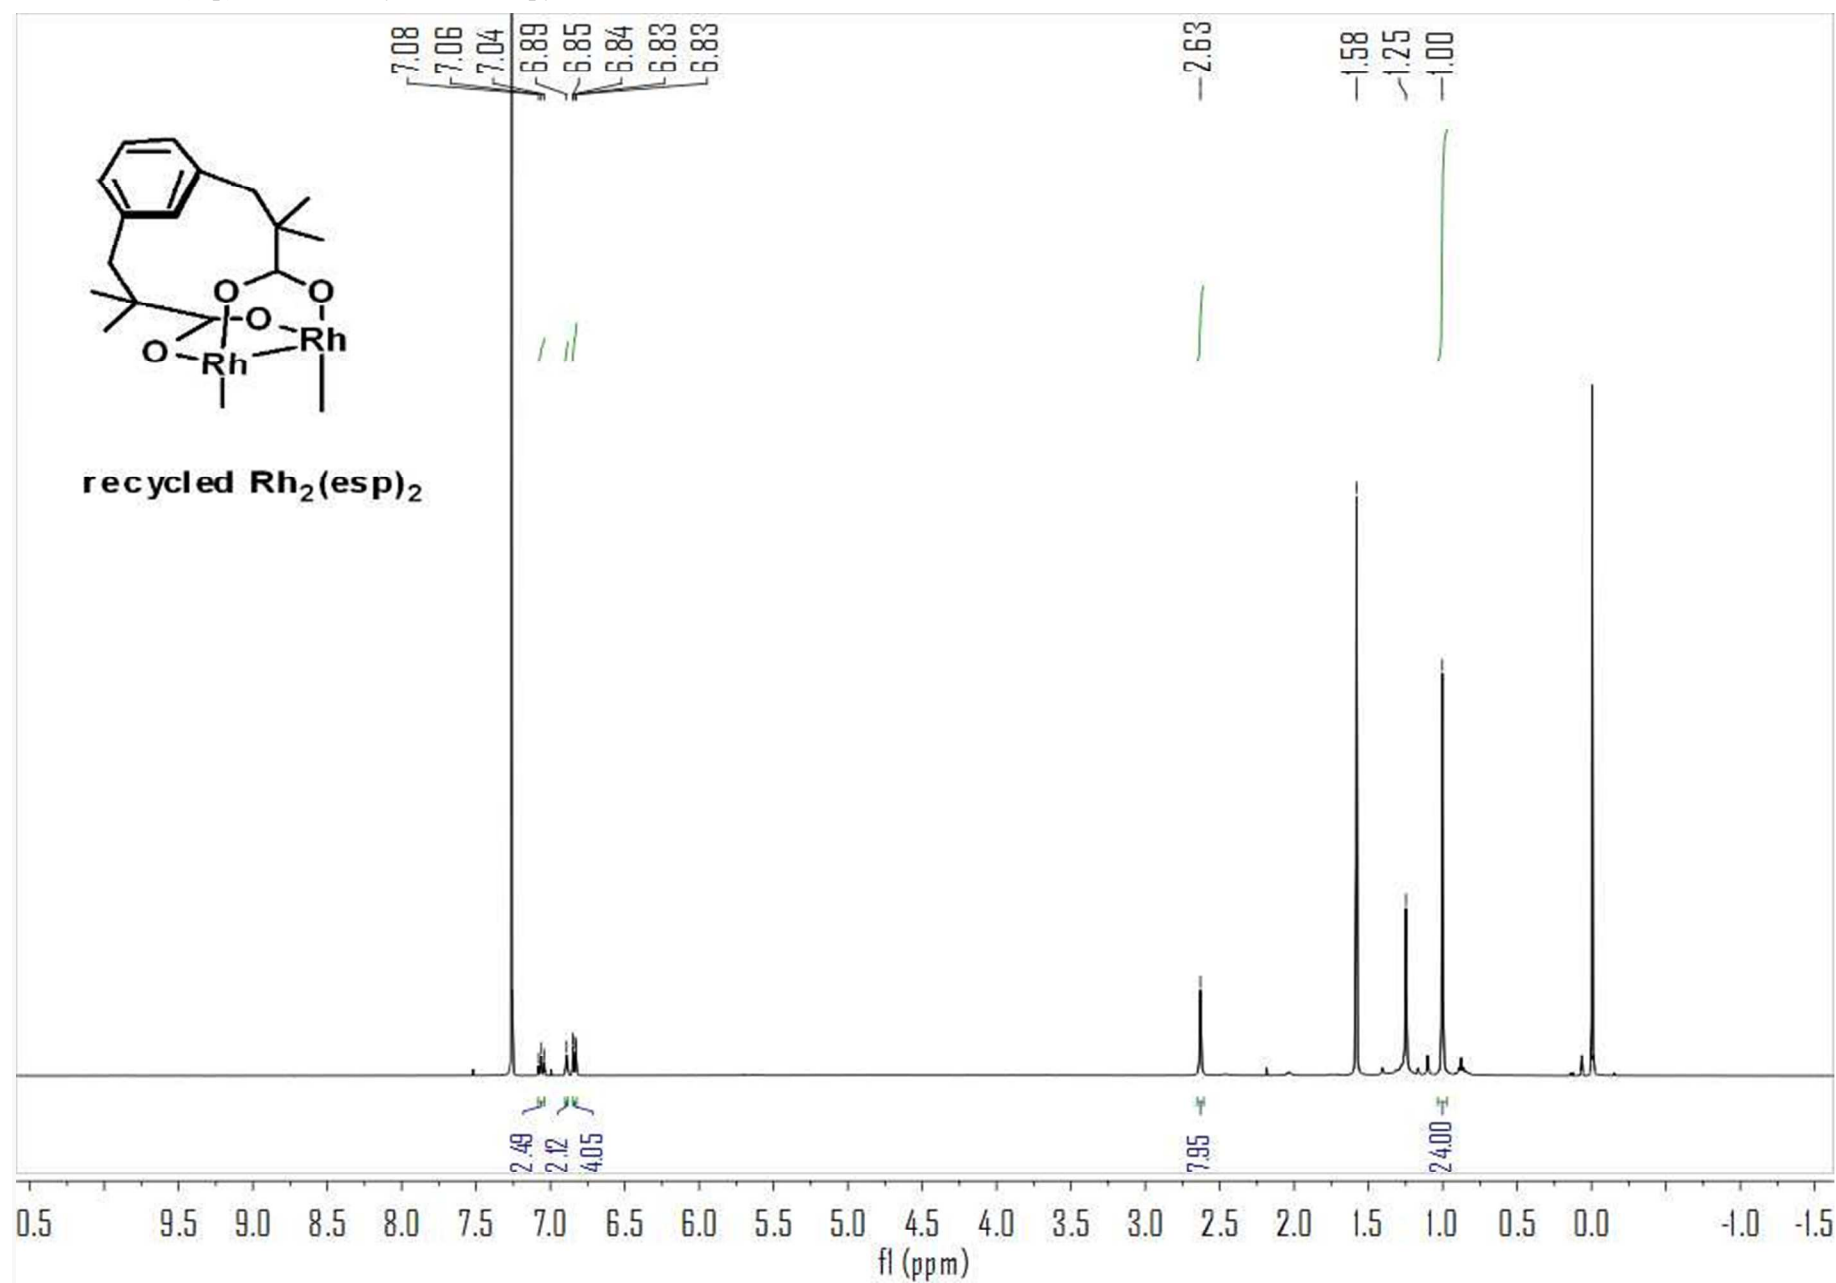



$^1\text{H}$  NMR of  $\text{Rh}_2(\text{MPDP})_2$

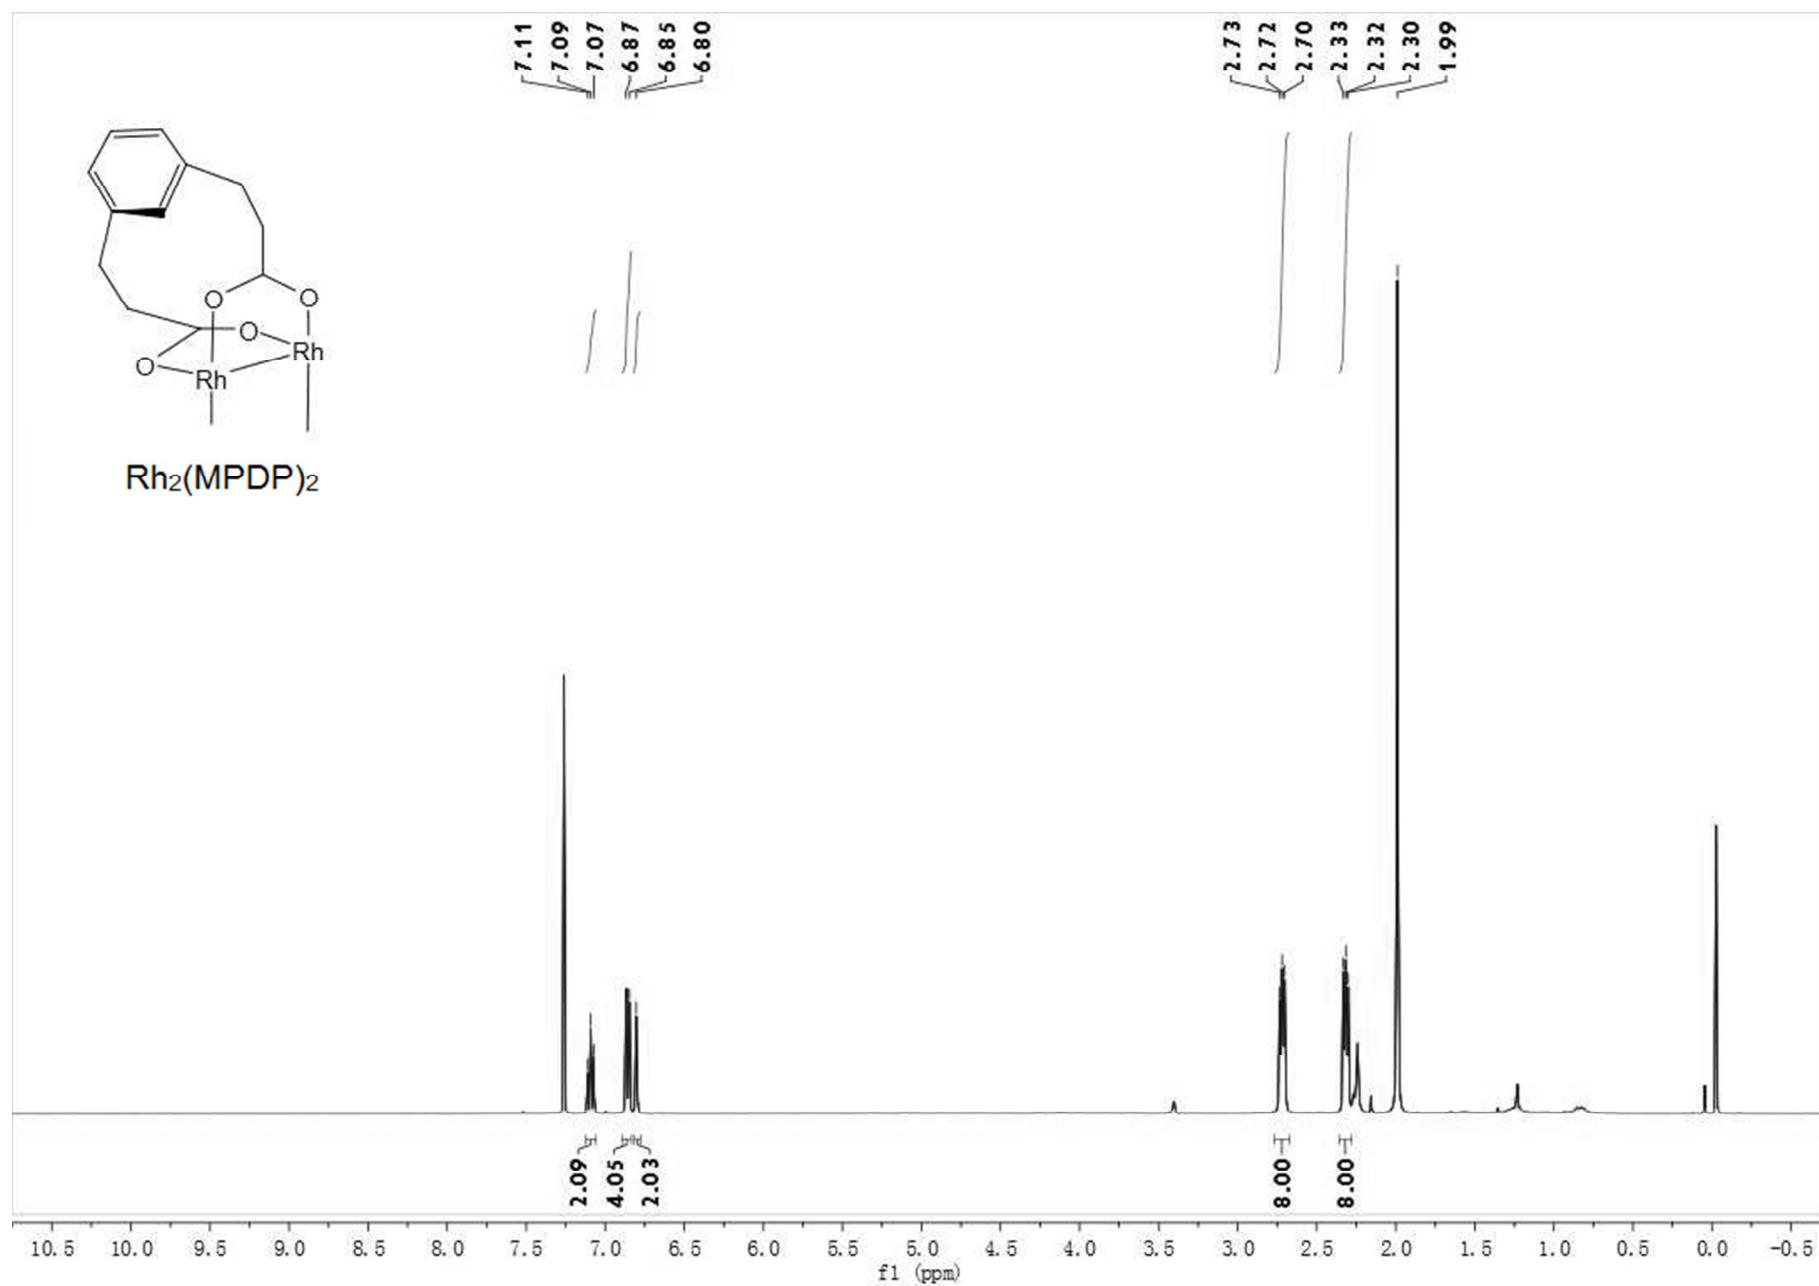

$^1\text{H}$  NMR of  $\text{Rh}_2(\text{OAc})_4(\text{IMes})$

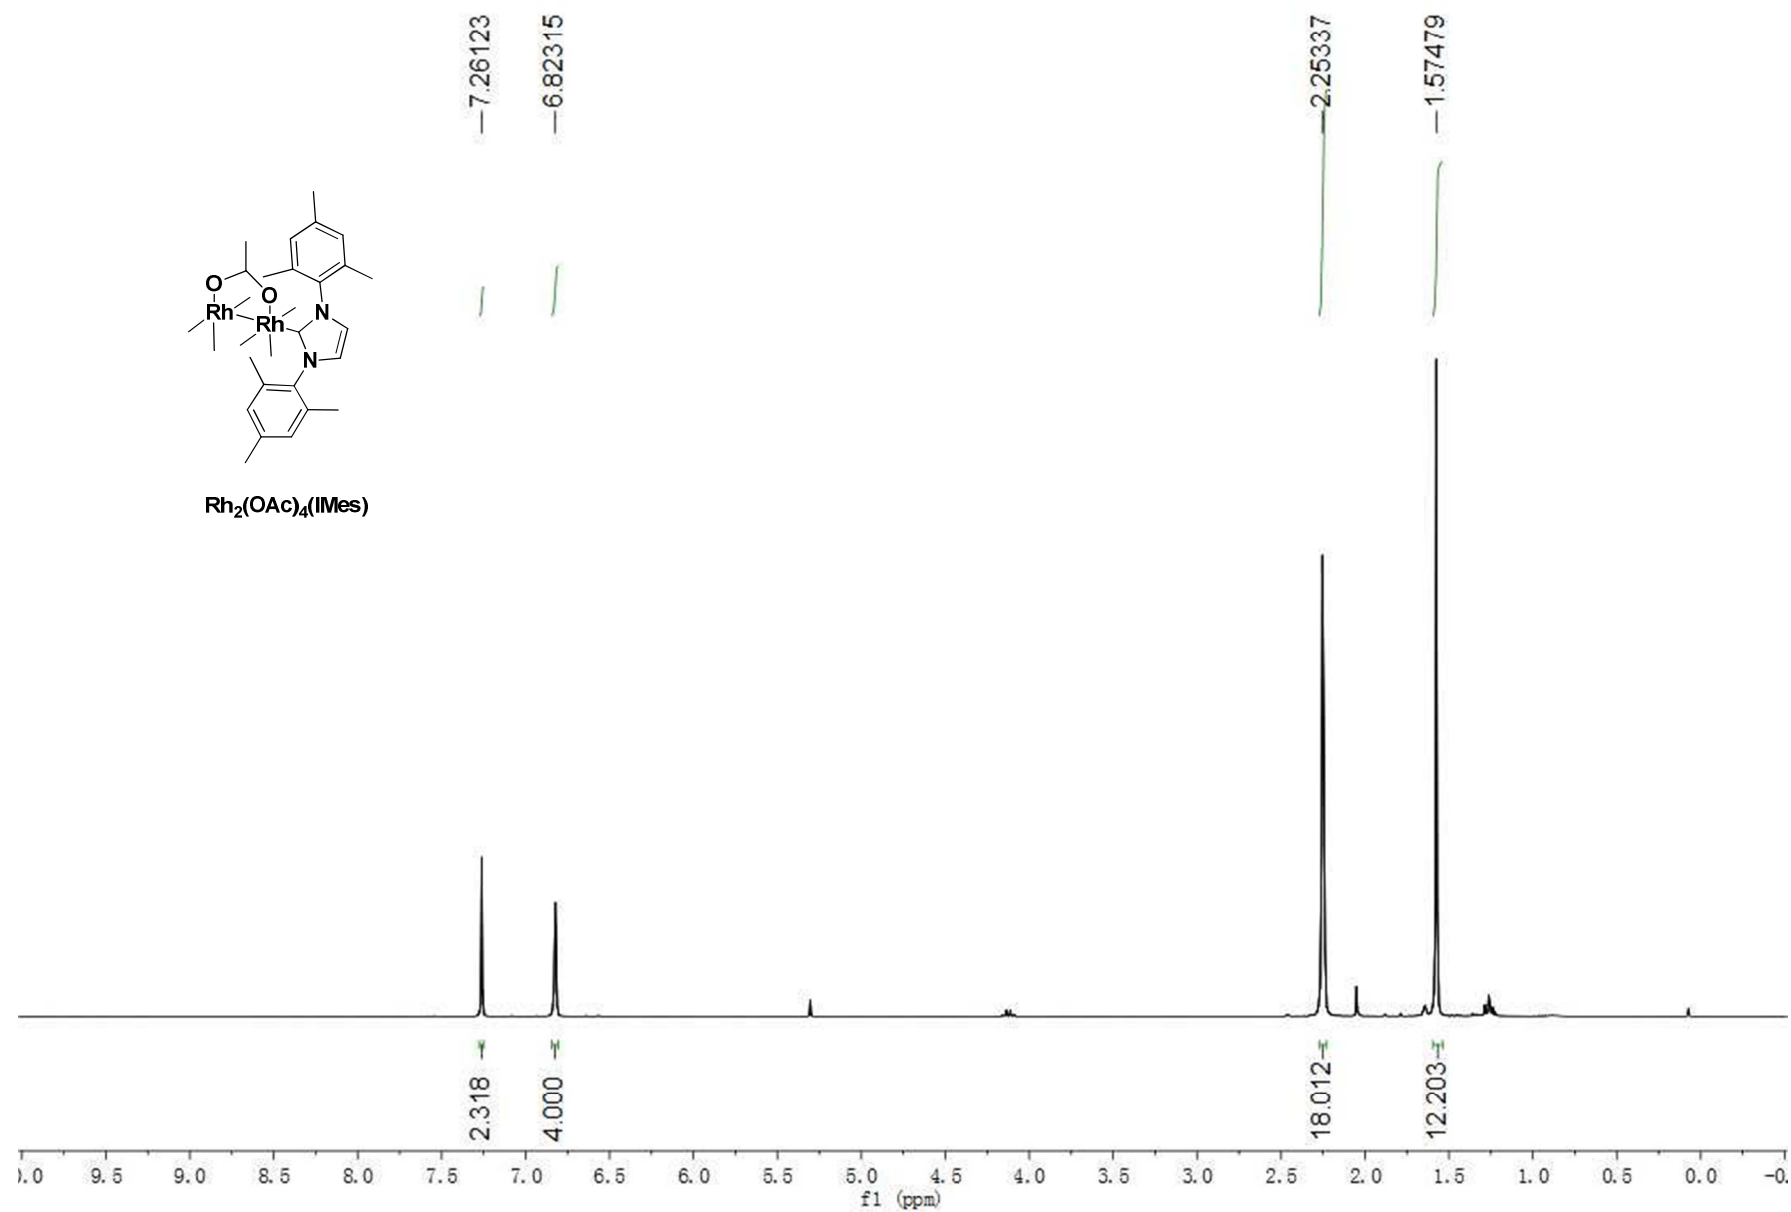

$^1\text{H}$  NMR and  $^{13}\text{C}$  NMR of **2a** which was purified by column.

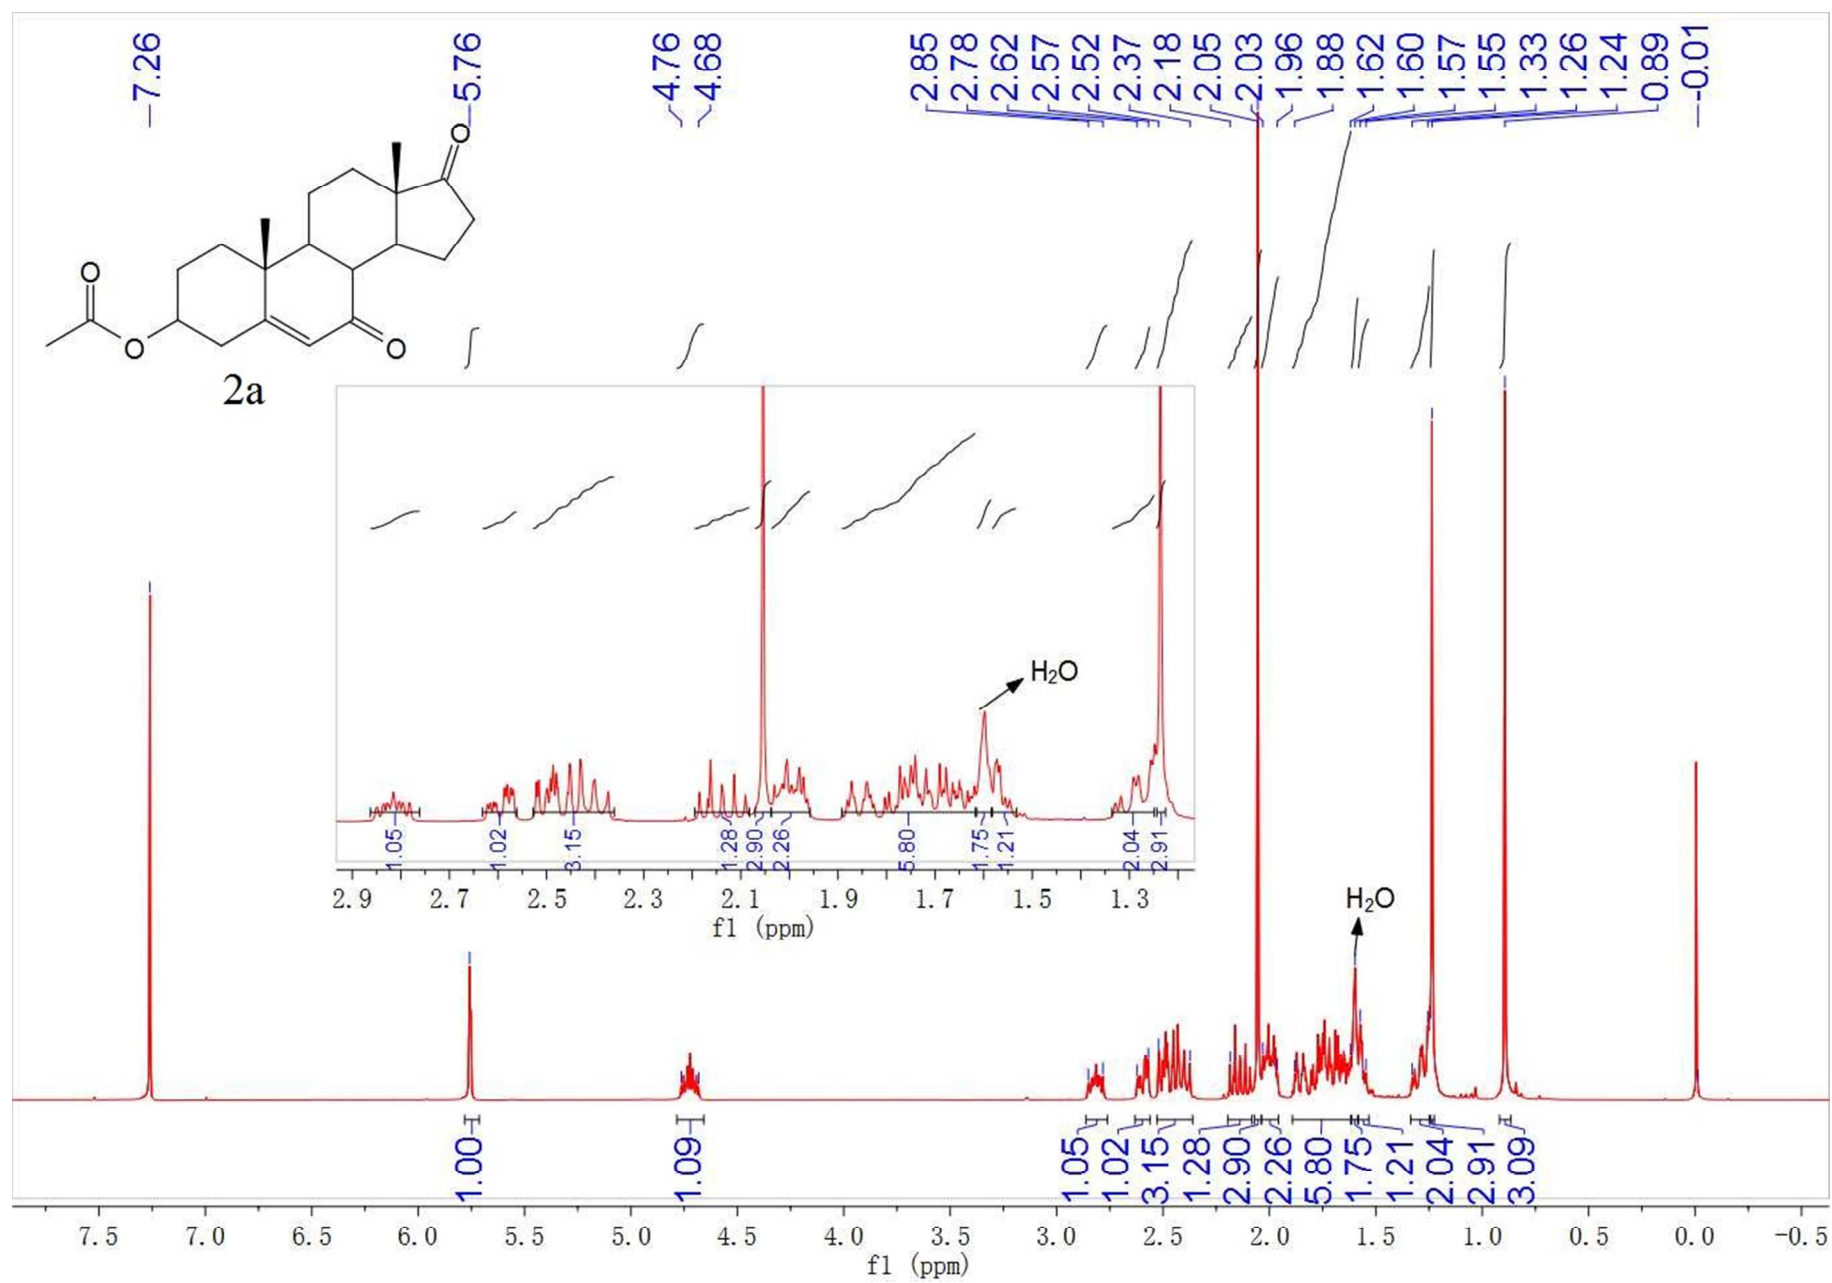

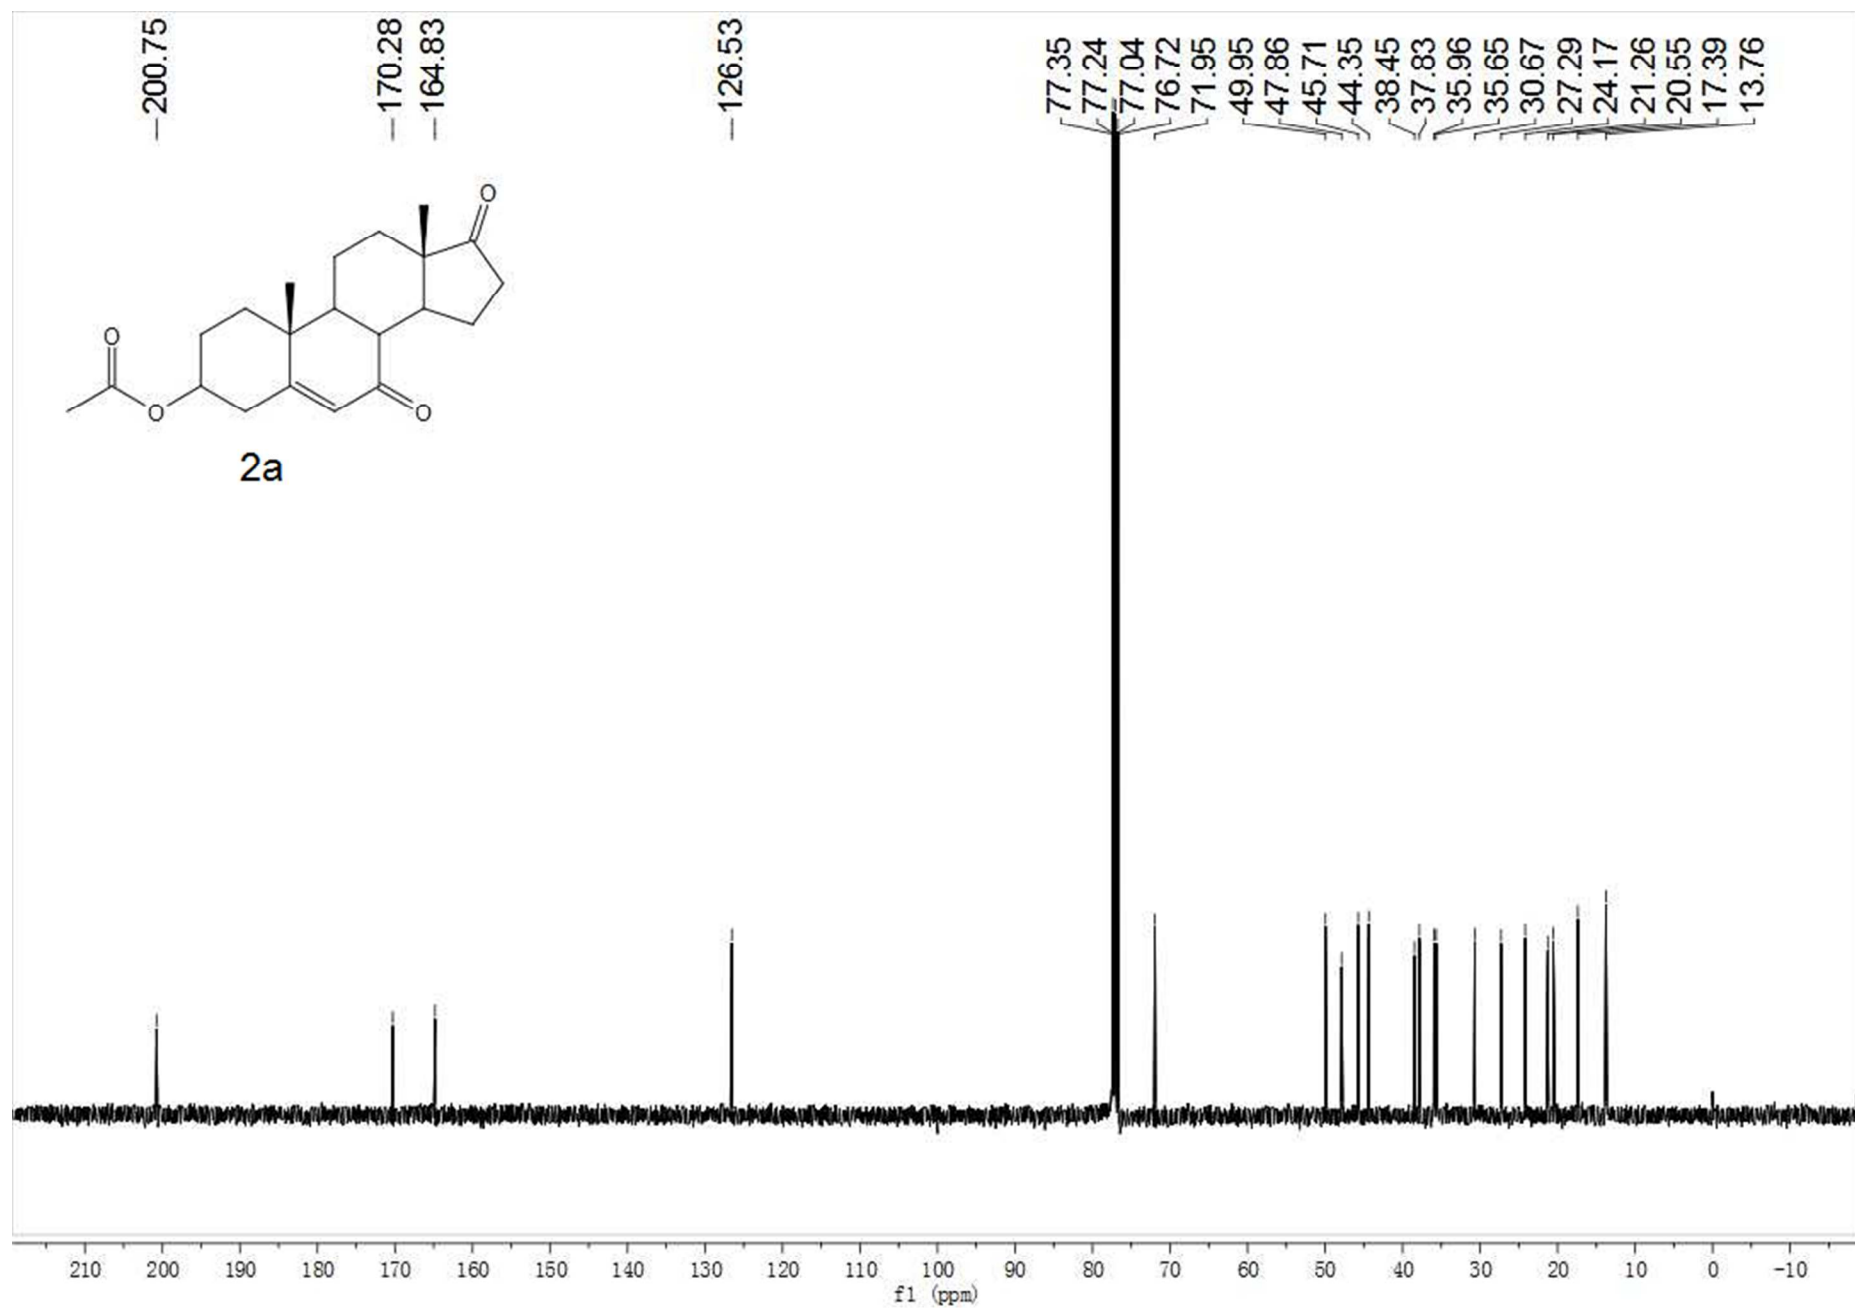

$^1\text{H}$  NMR of **2a** which was directly precipitated from the reaction mixture.

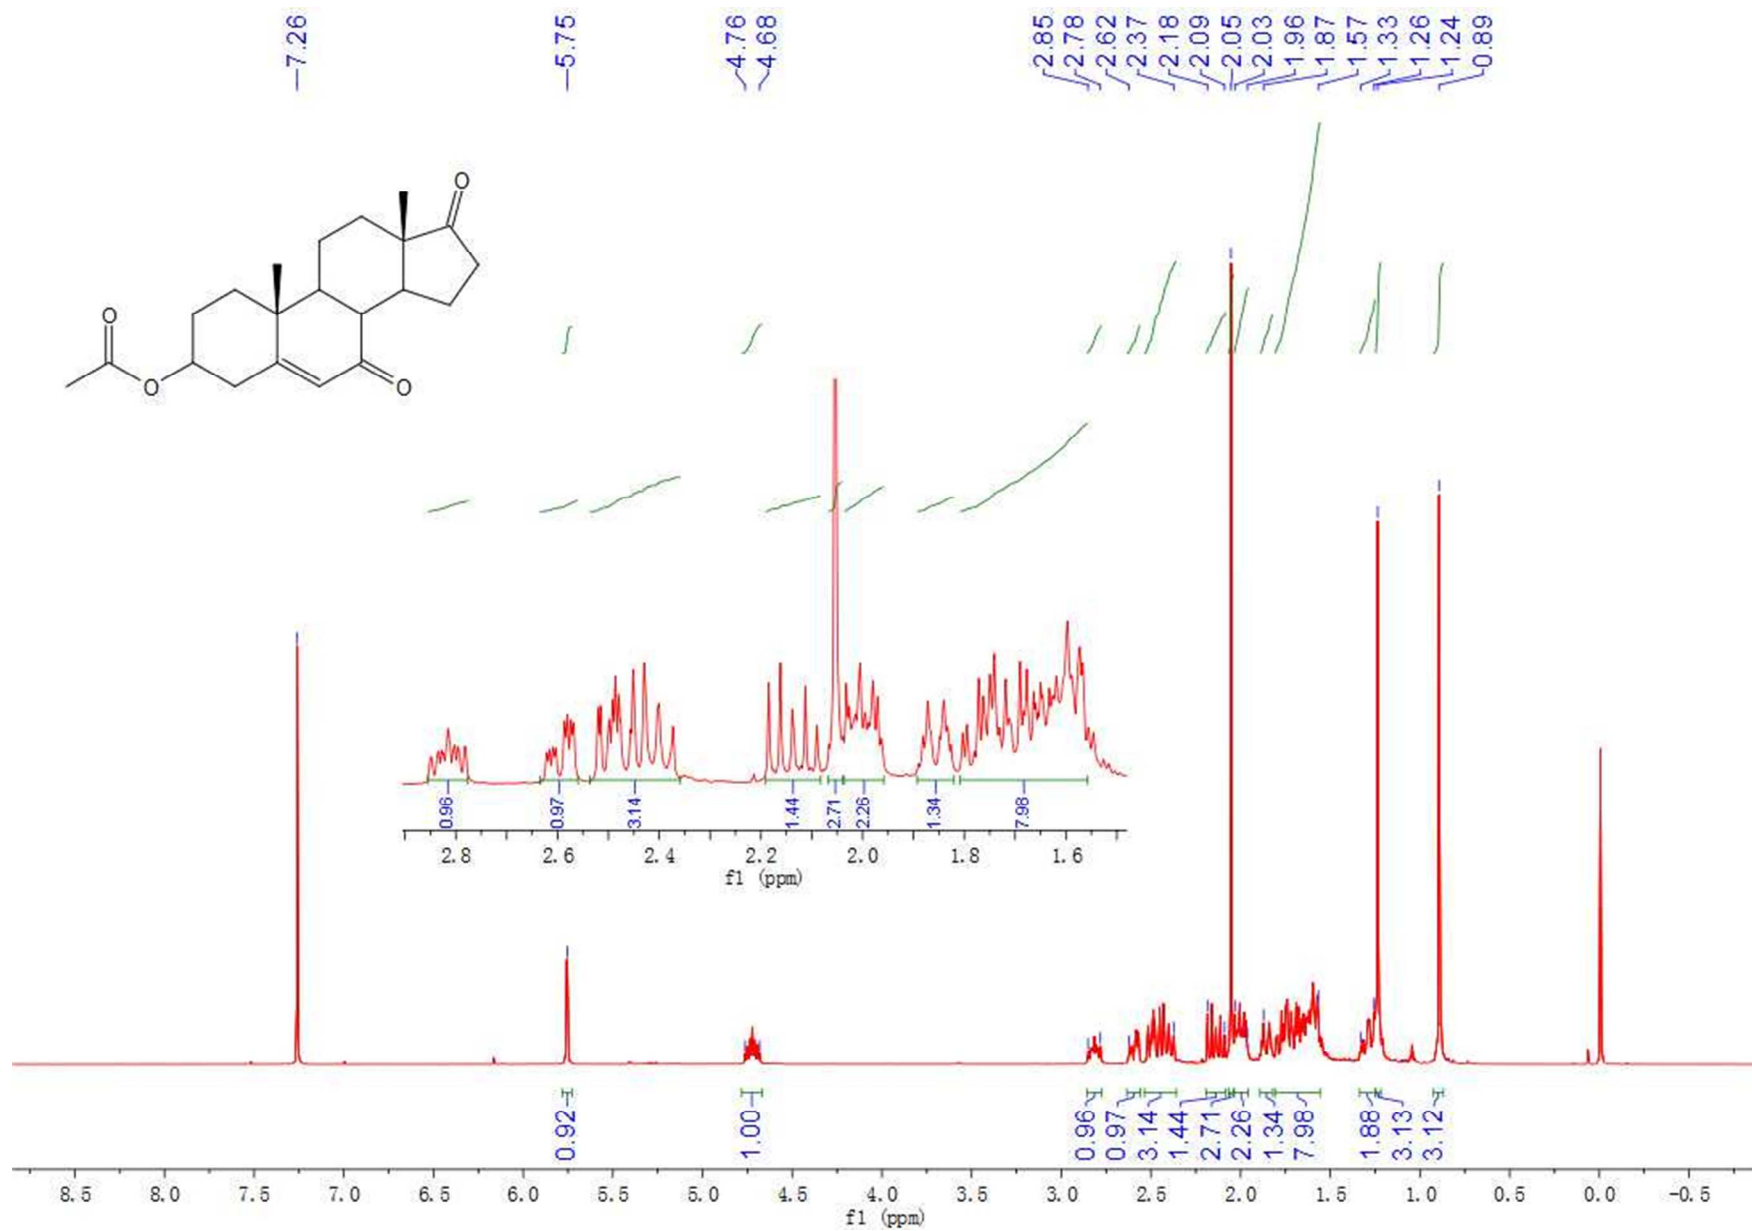

$^1\text{H}$  NMR and  $^{13}\text{C}$  NMR of **2b**.

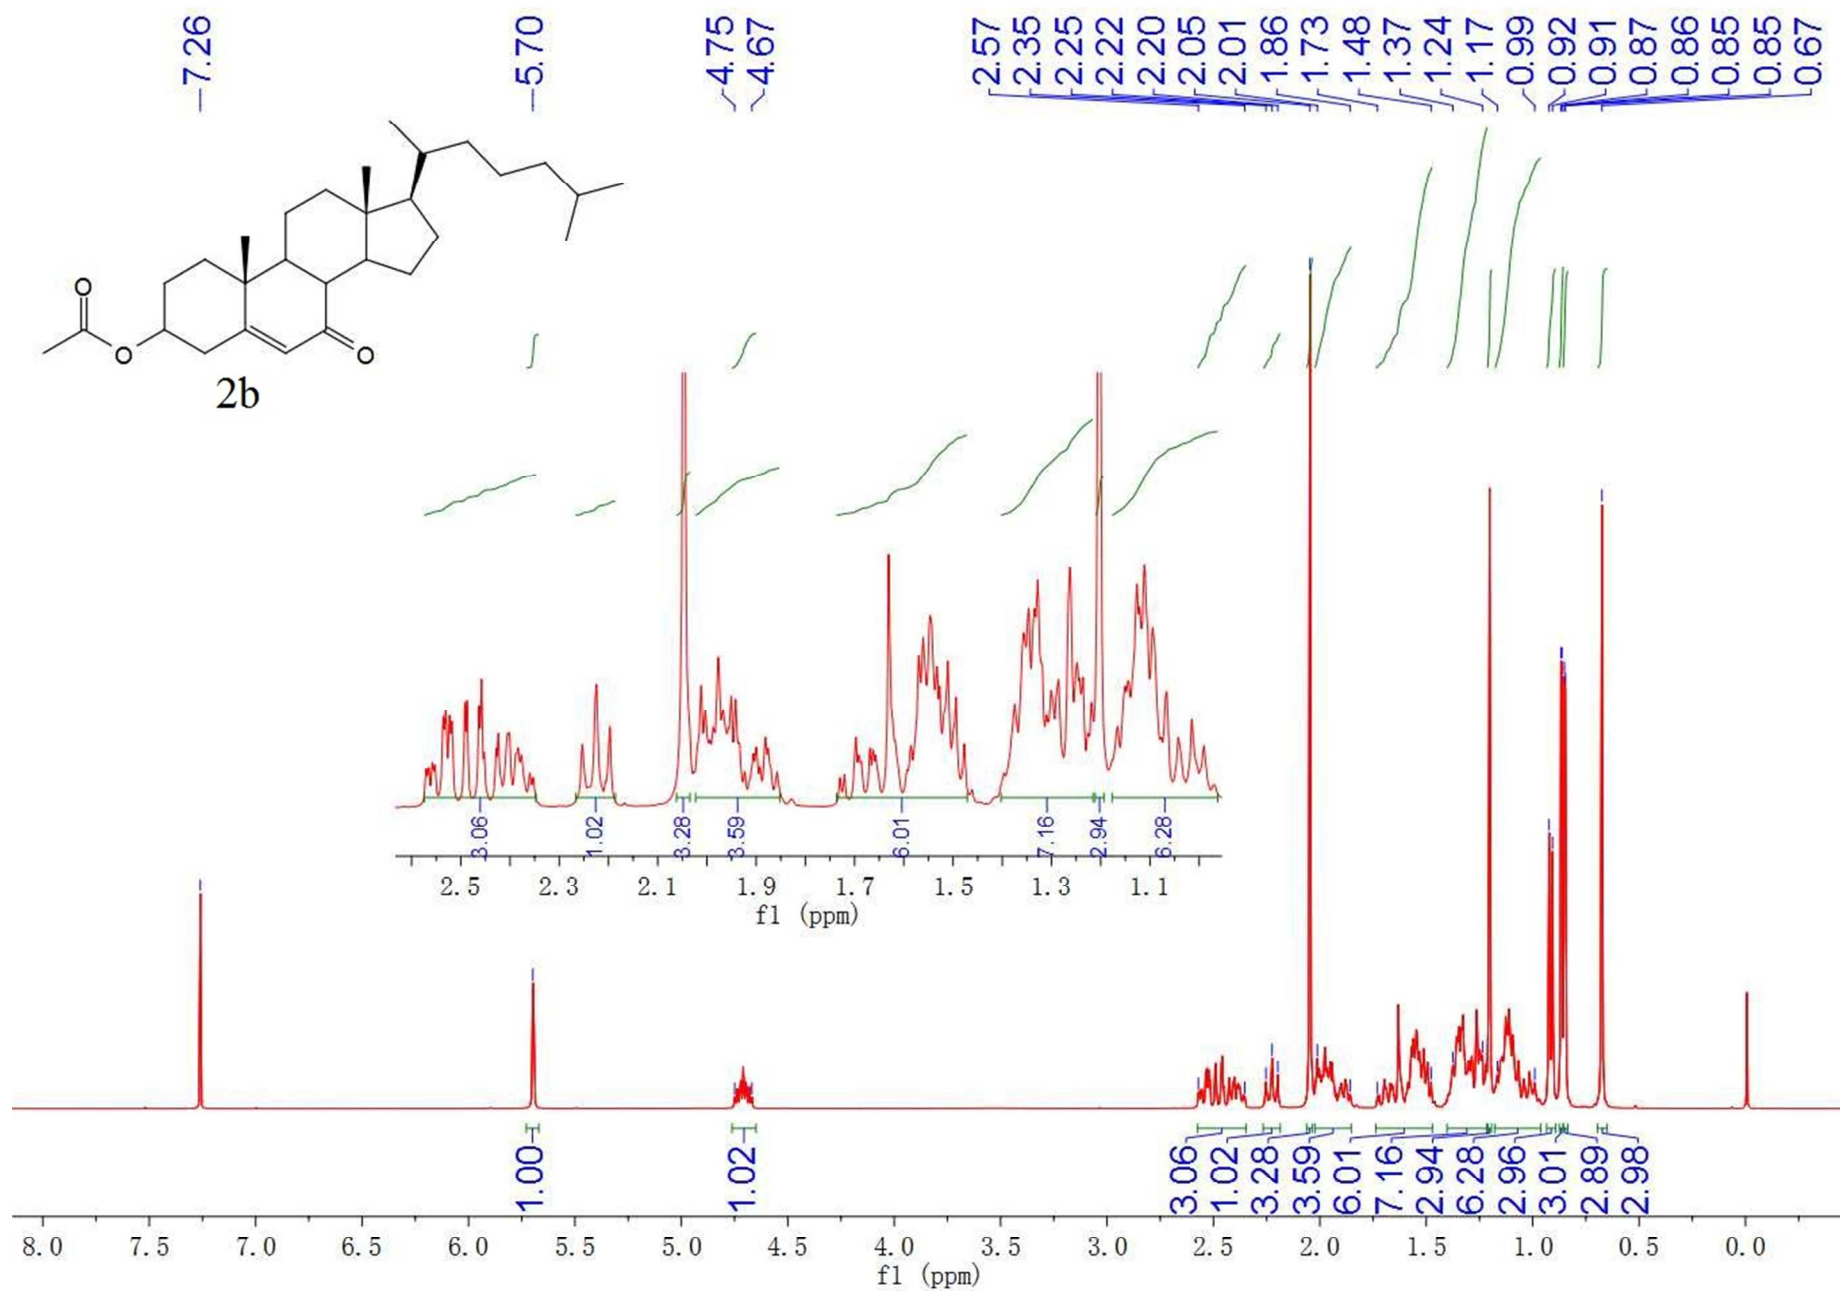

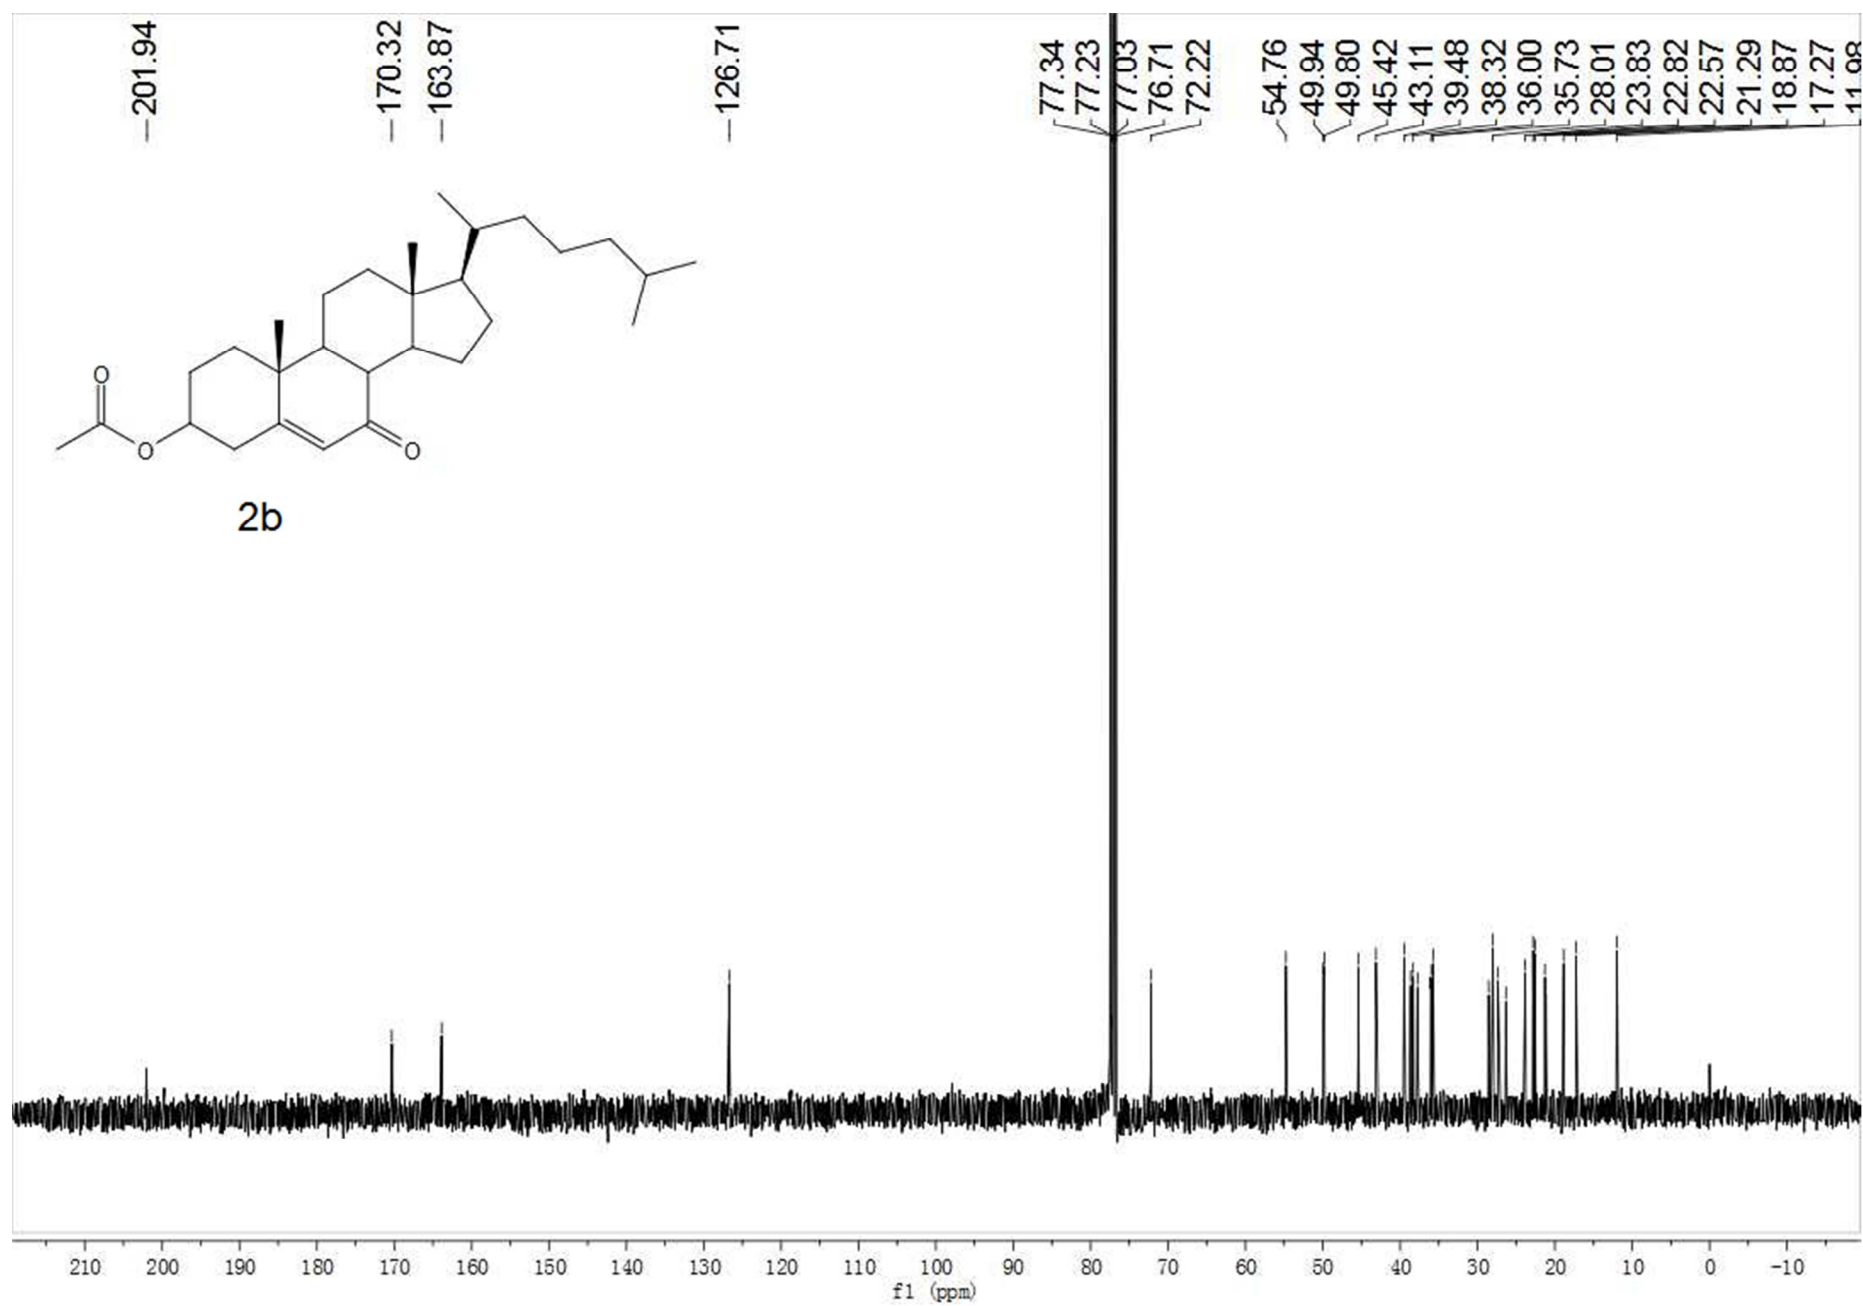



$^1\text{H}$  NMR and  $^{13}\text{C}$  NMR of **2c**.

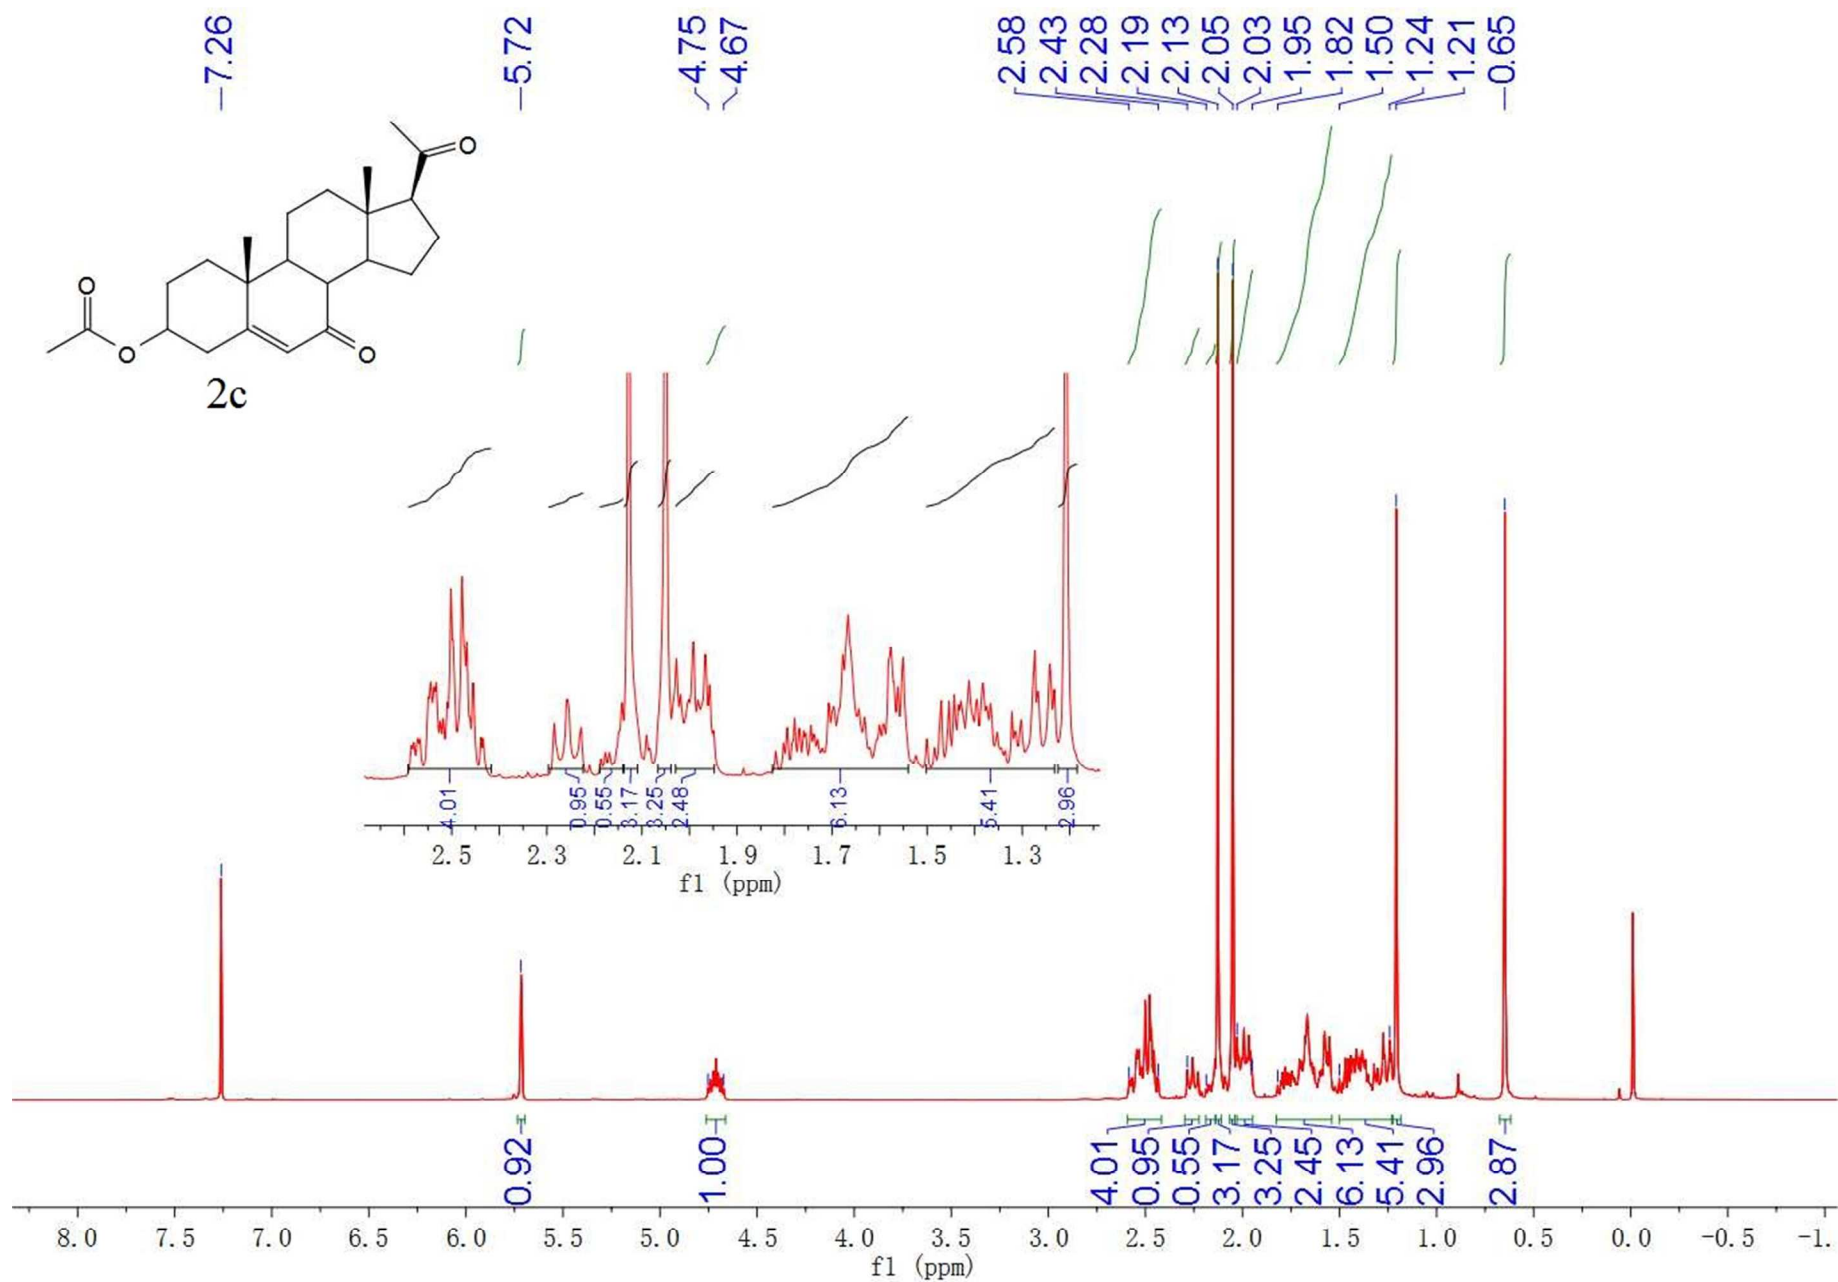



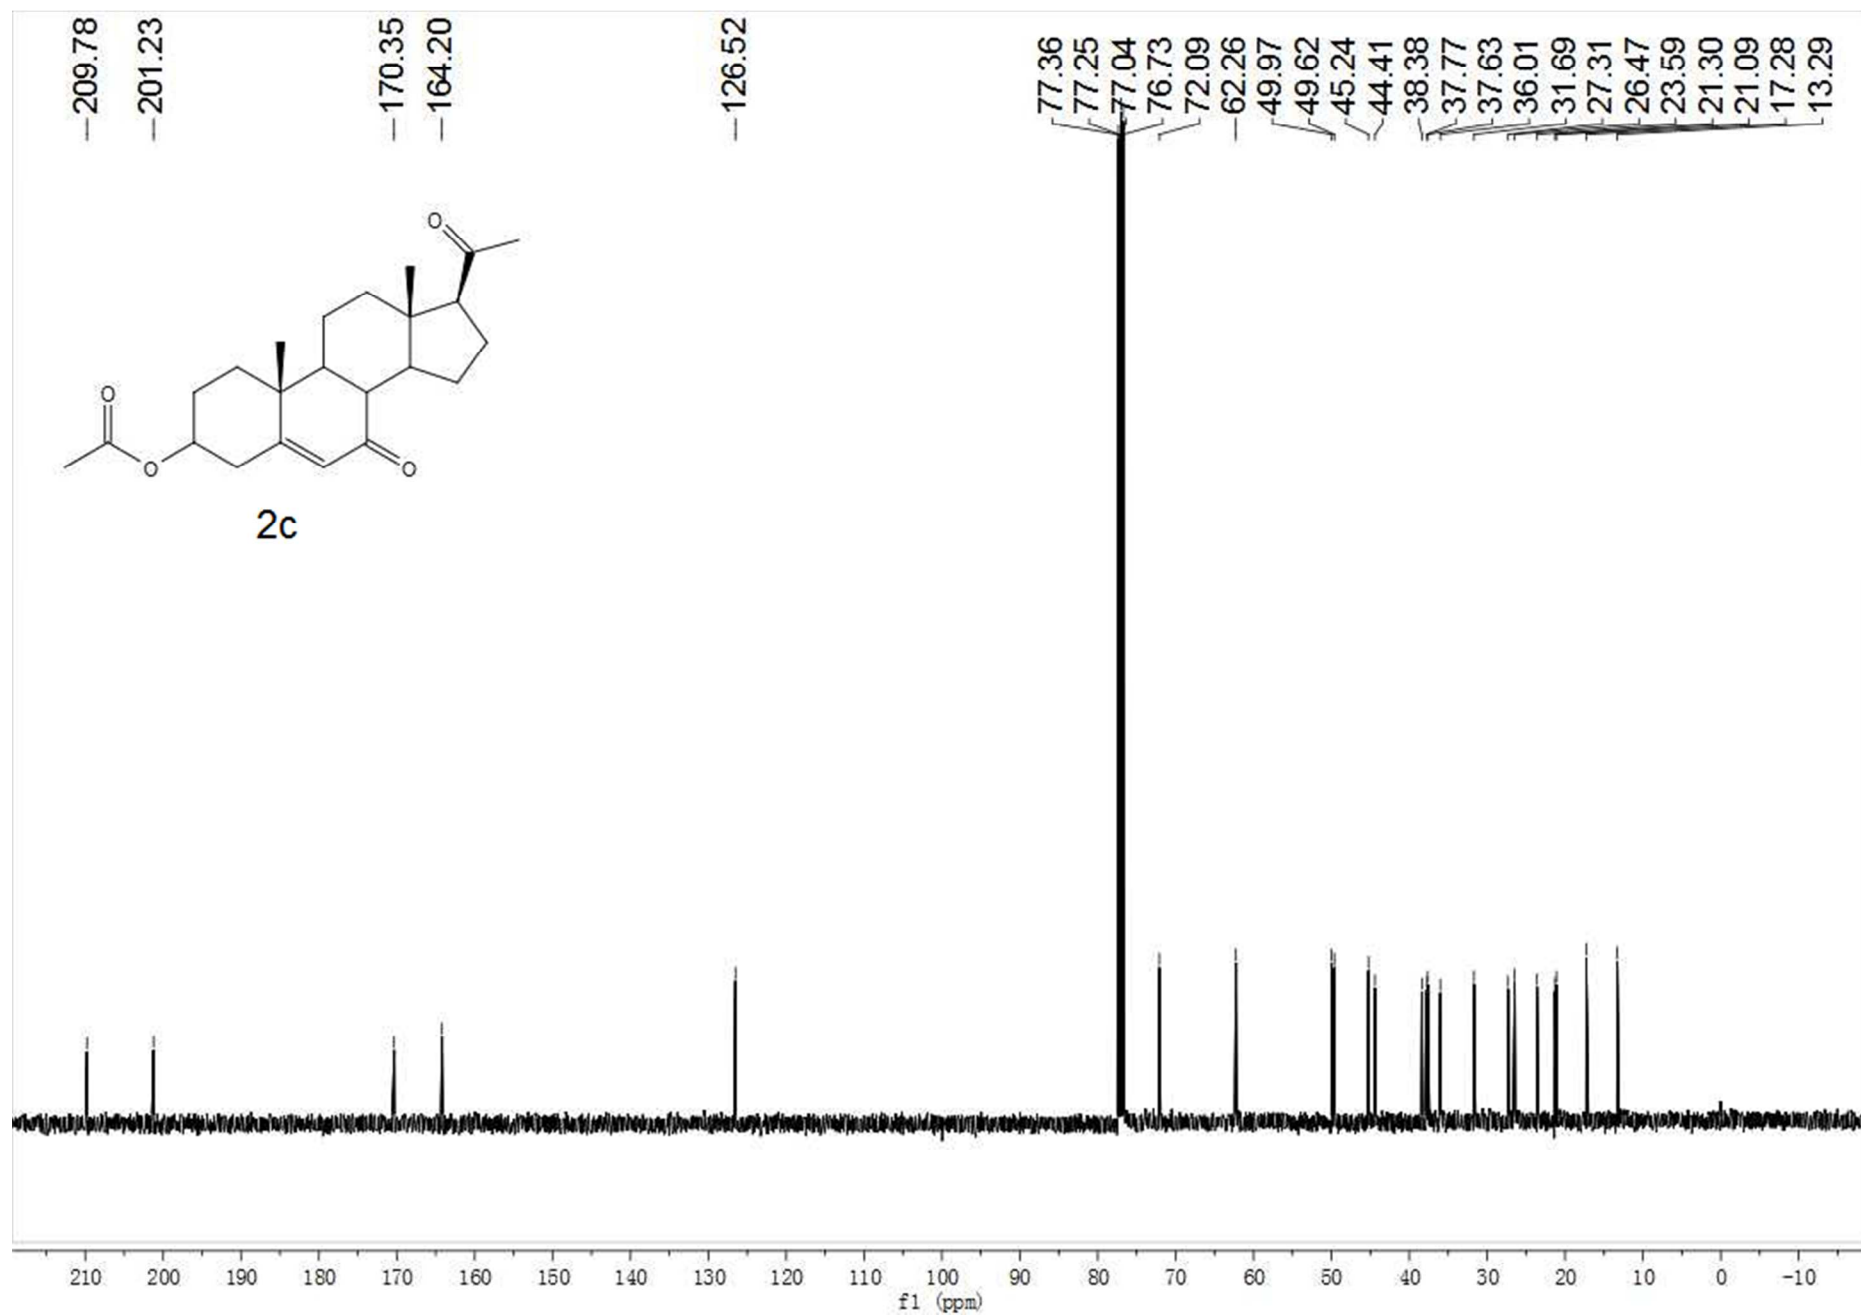

$^1\text{H}$  NMR and  $^{13}\text{C}$  NMR of **2d**.

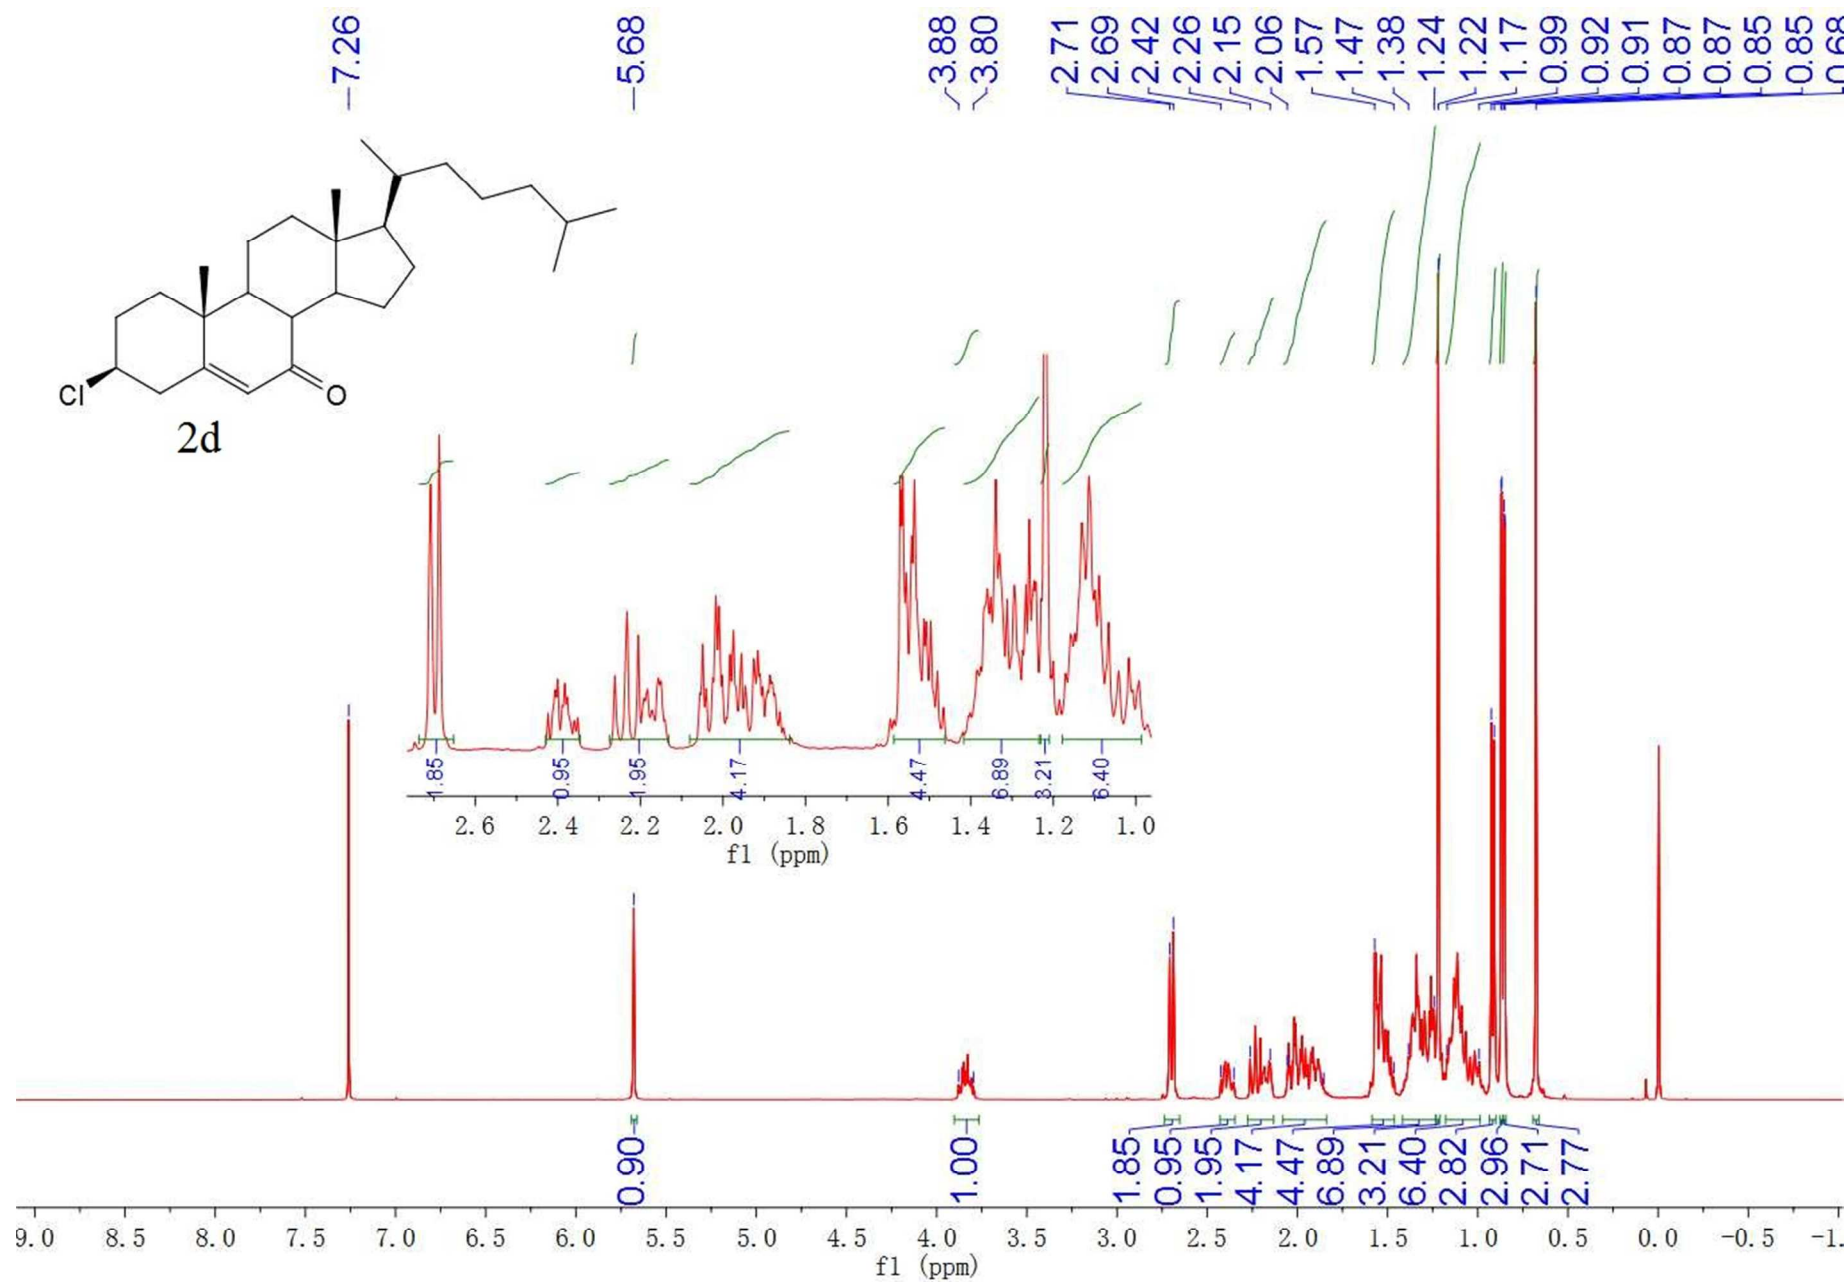

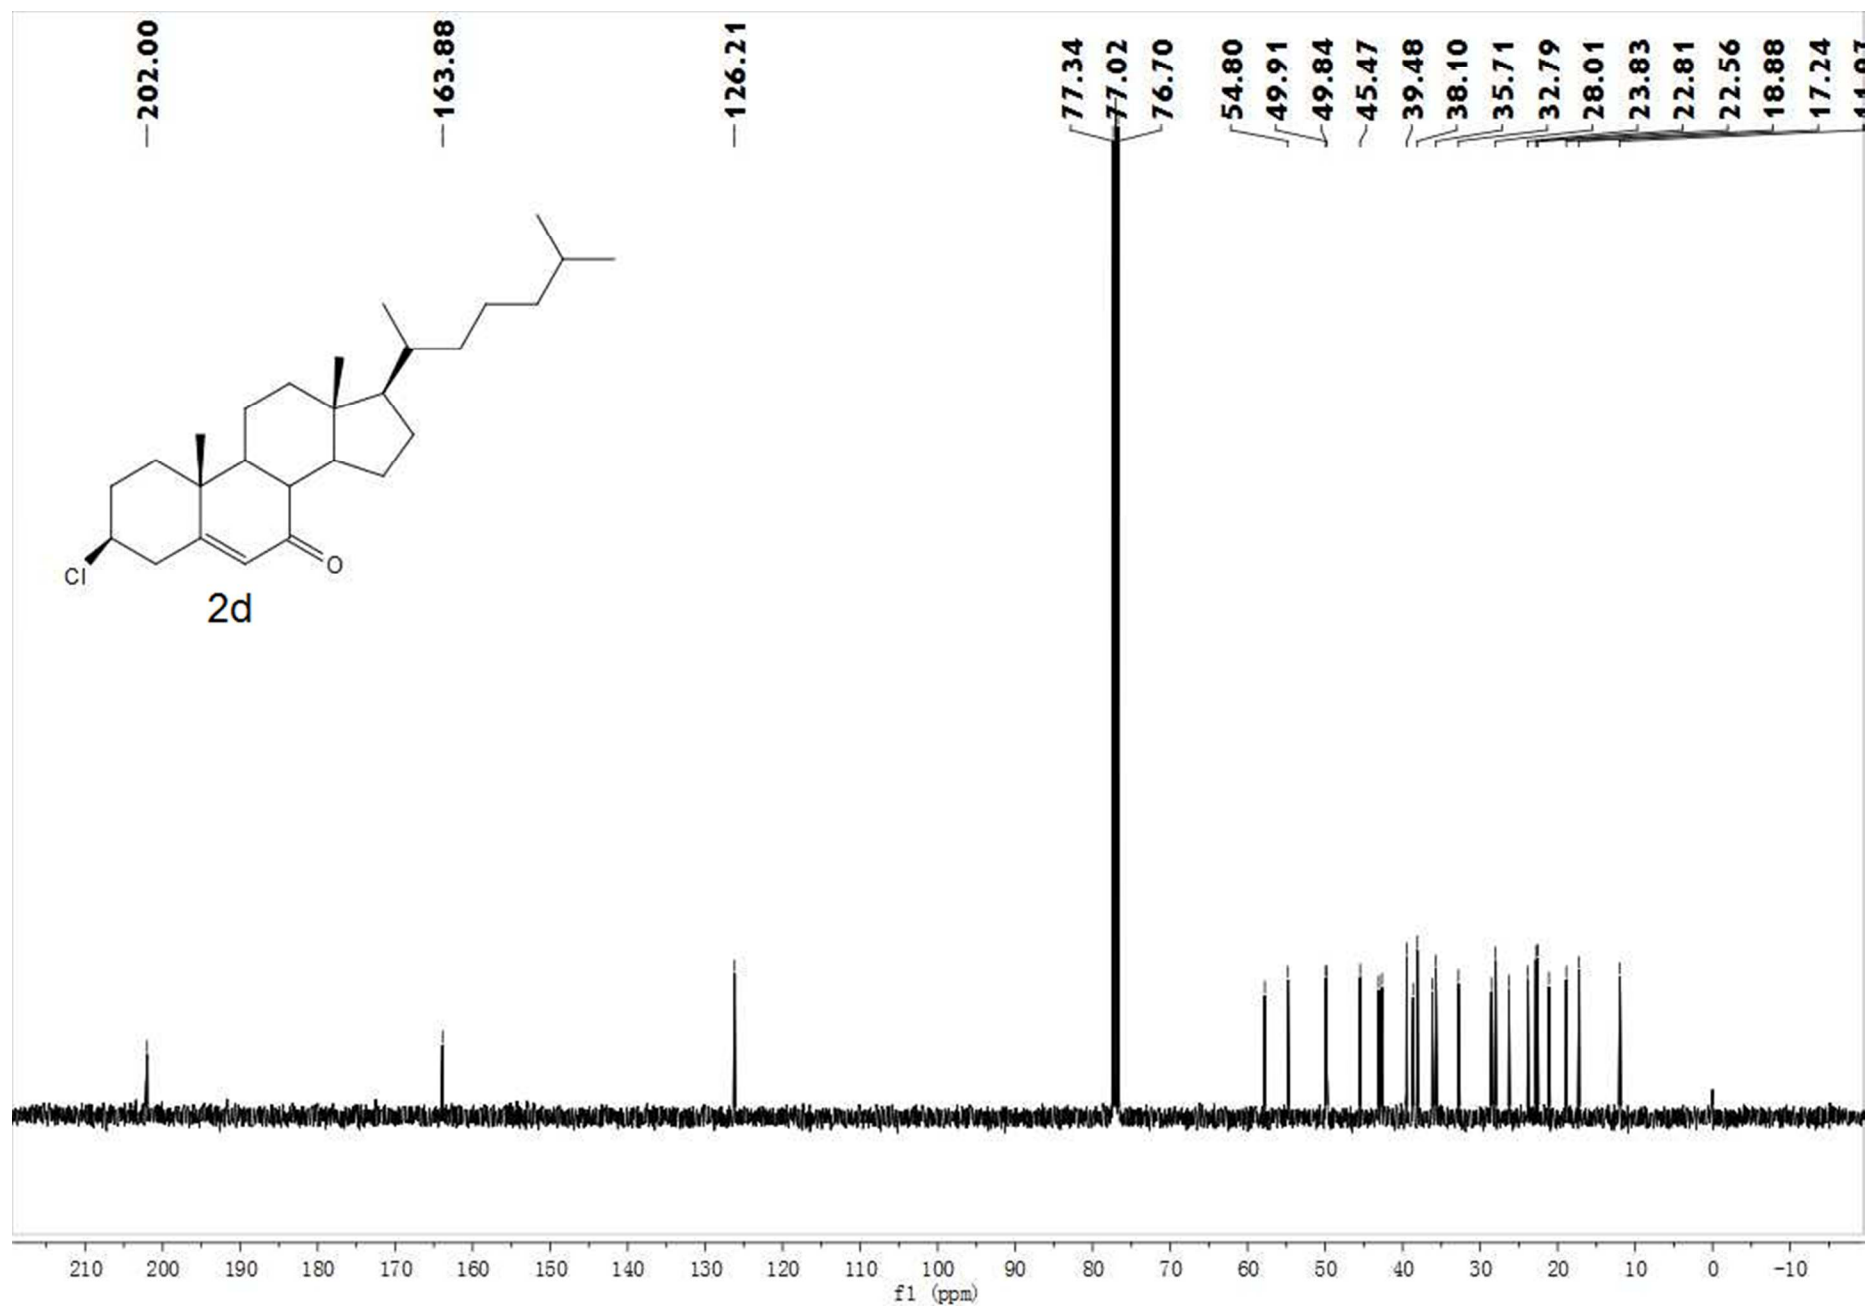

$^1\text{H}$  NMR and  $^{13}\text{C}$  NMR of **2e**.

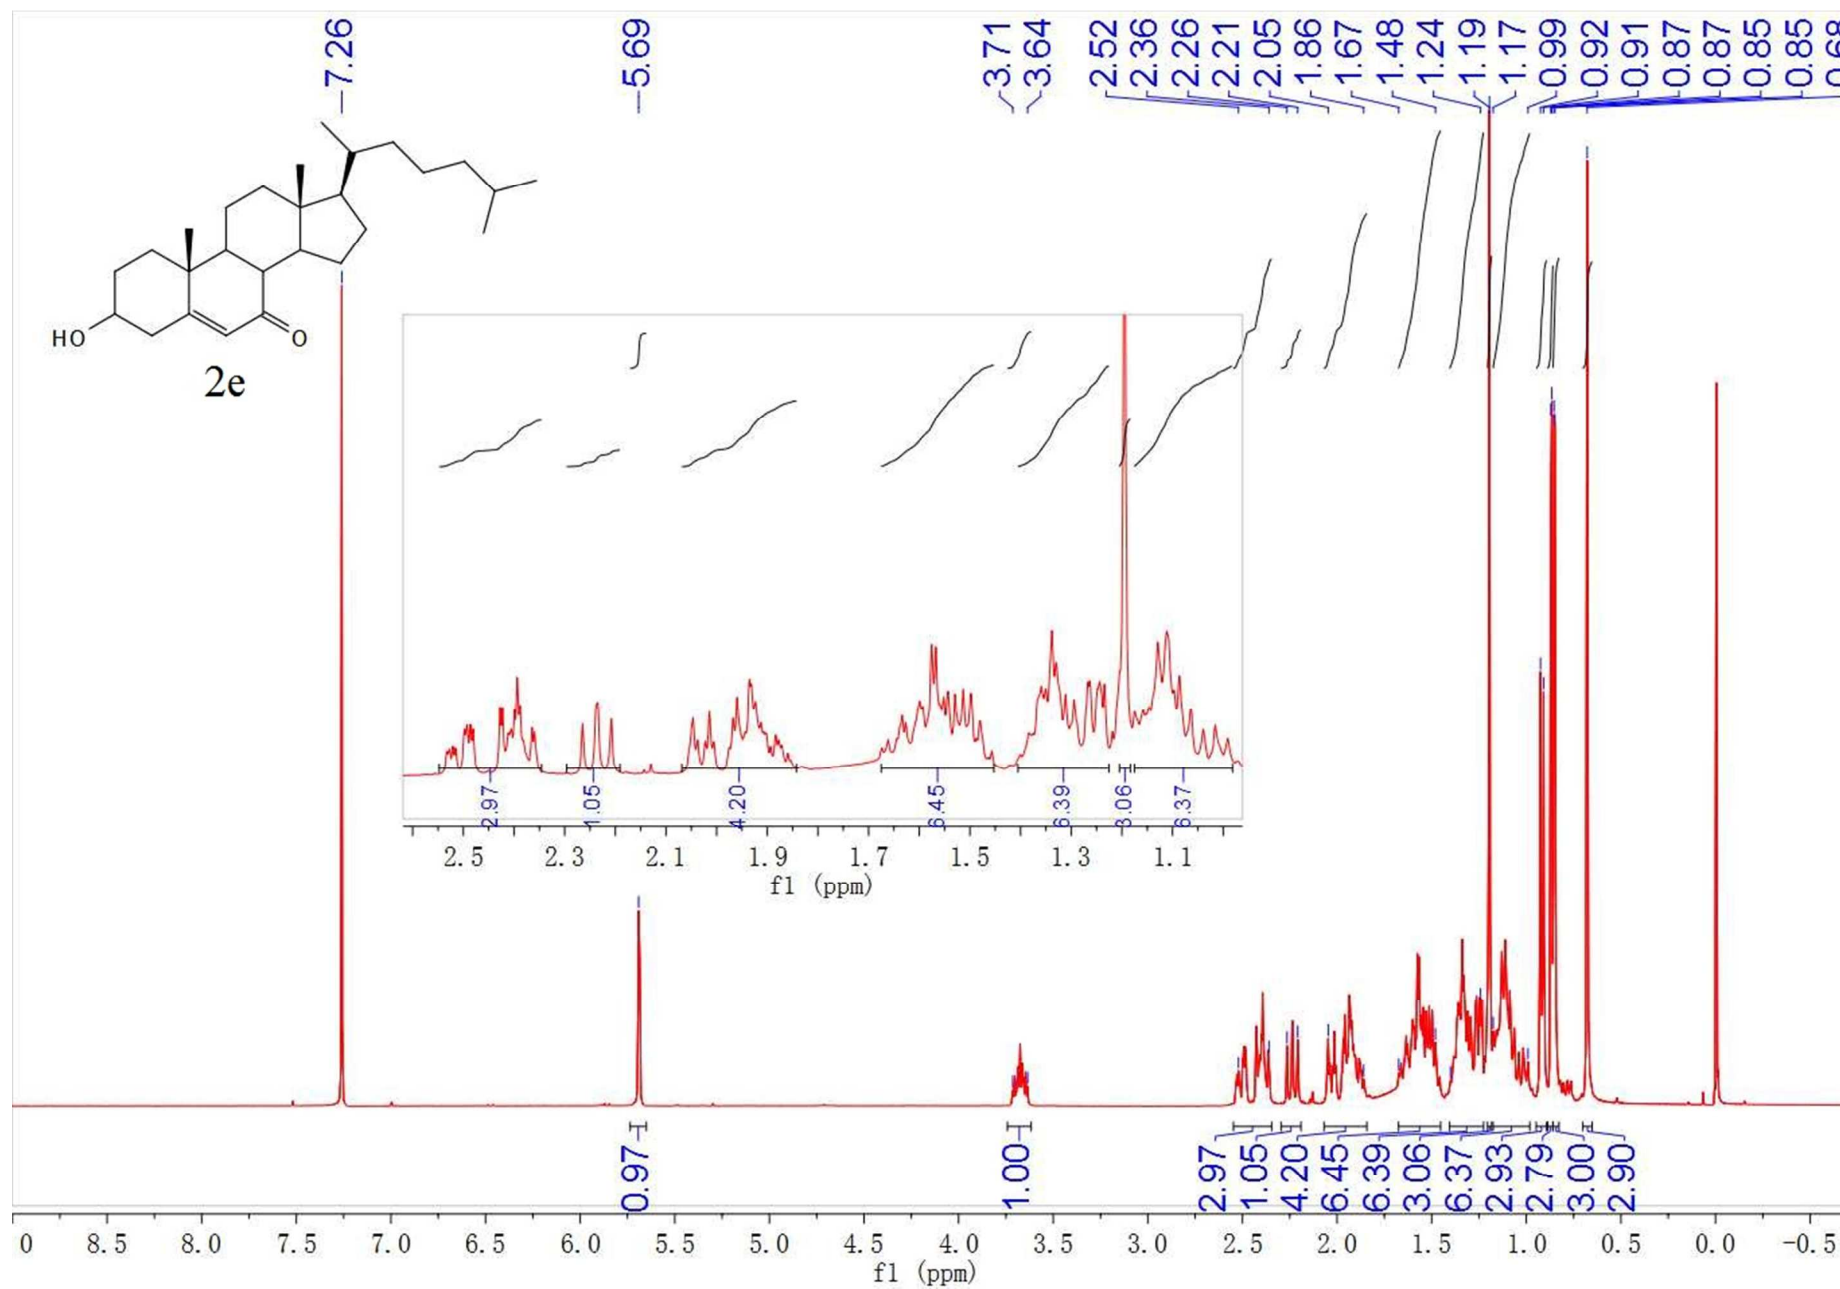

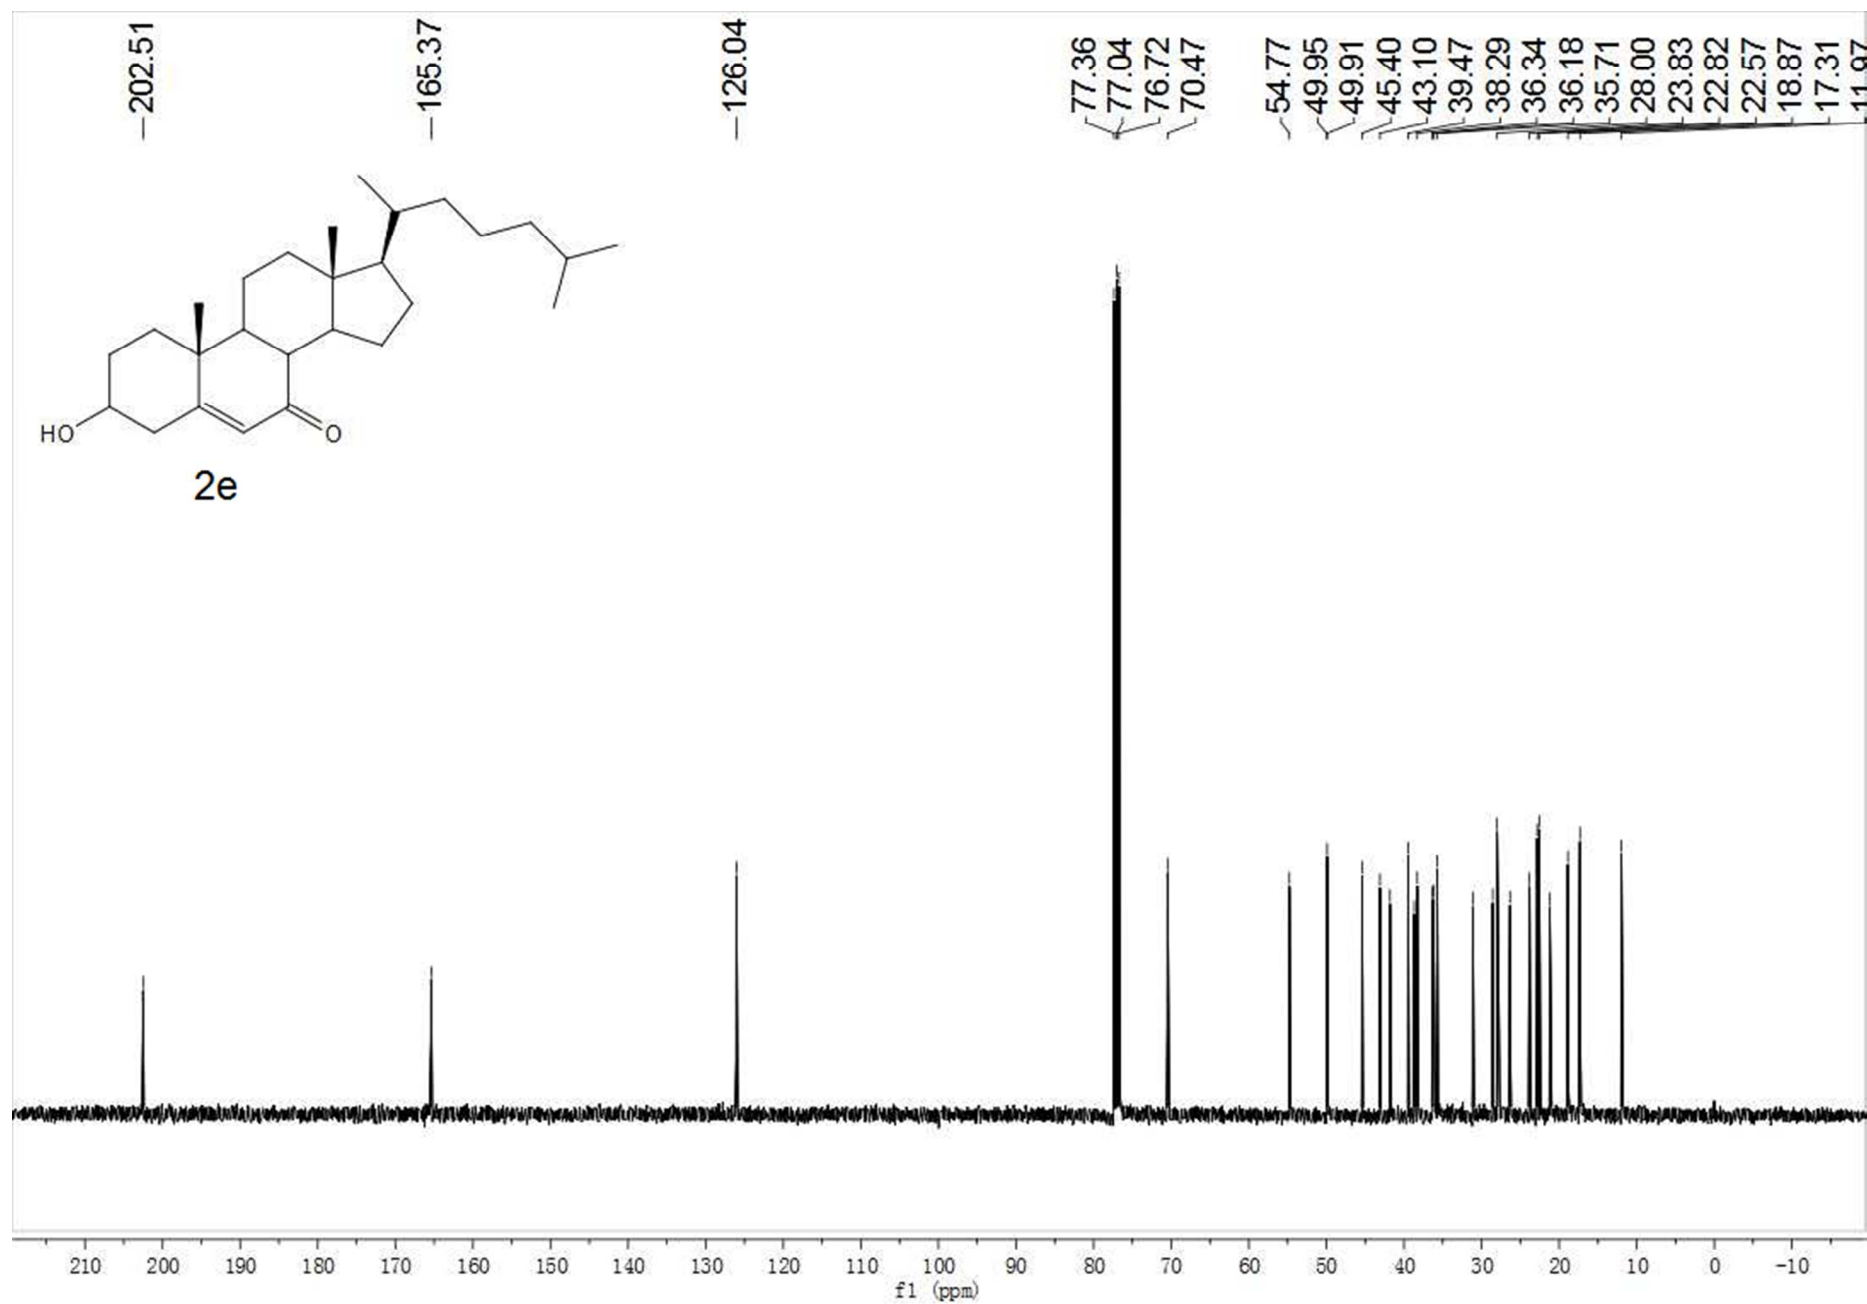

$^1\text{H}$  NMR and  $^{13}\text{C}$  NMR of **2f**.

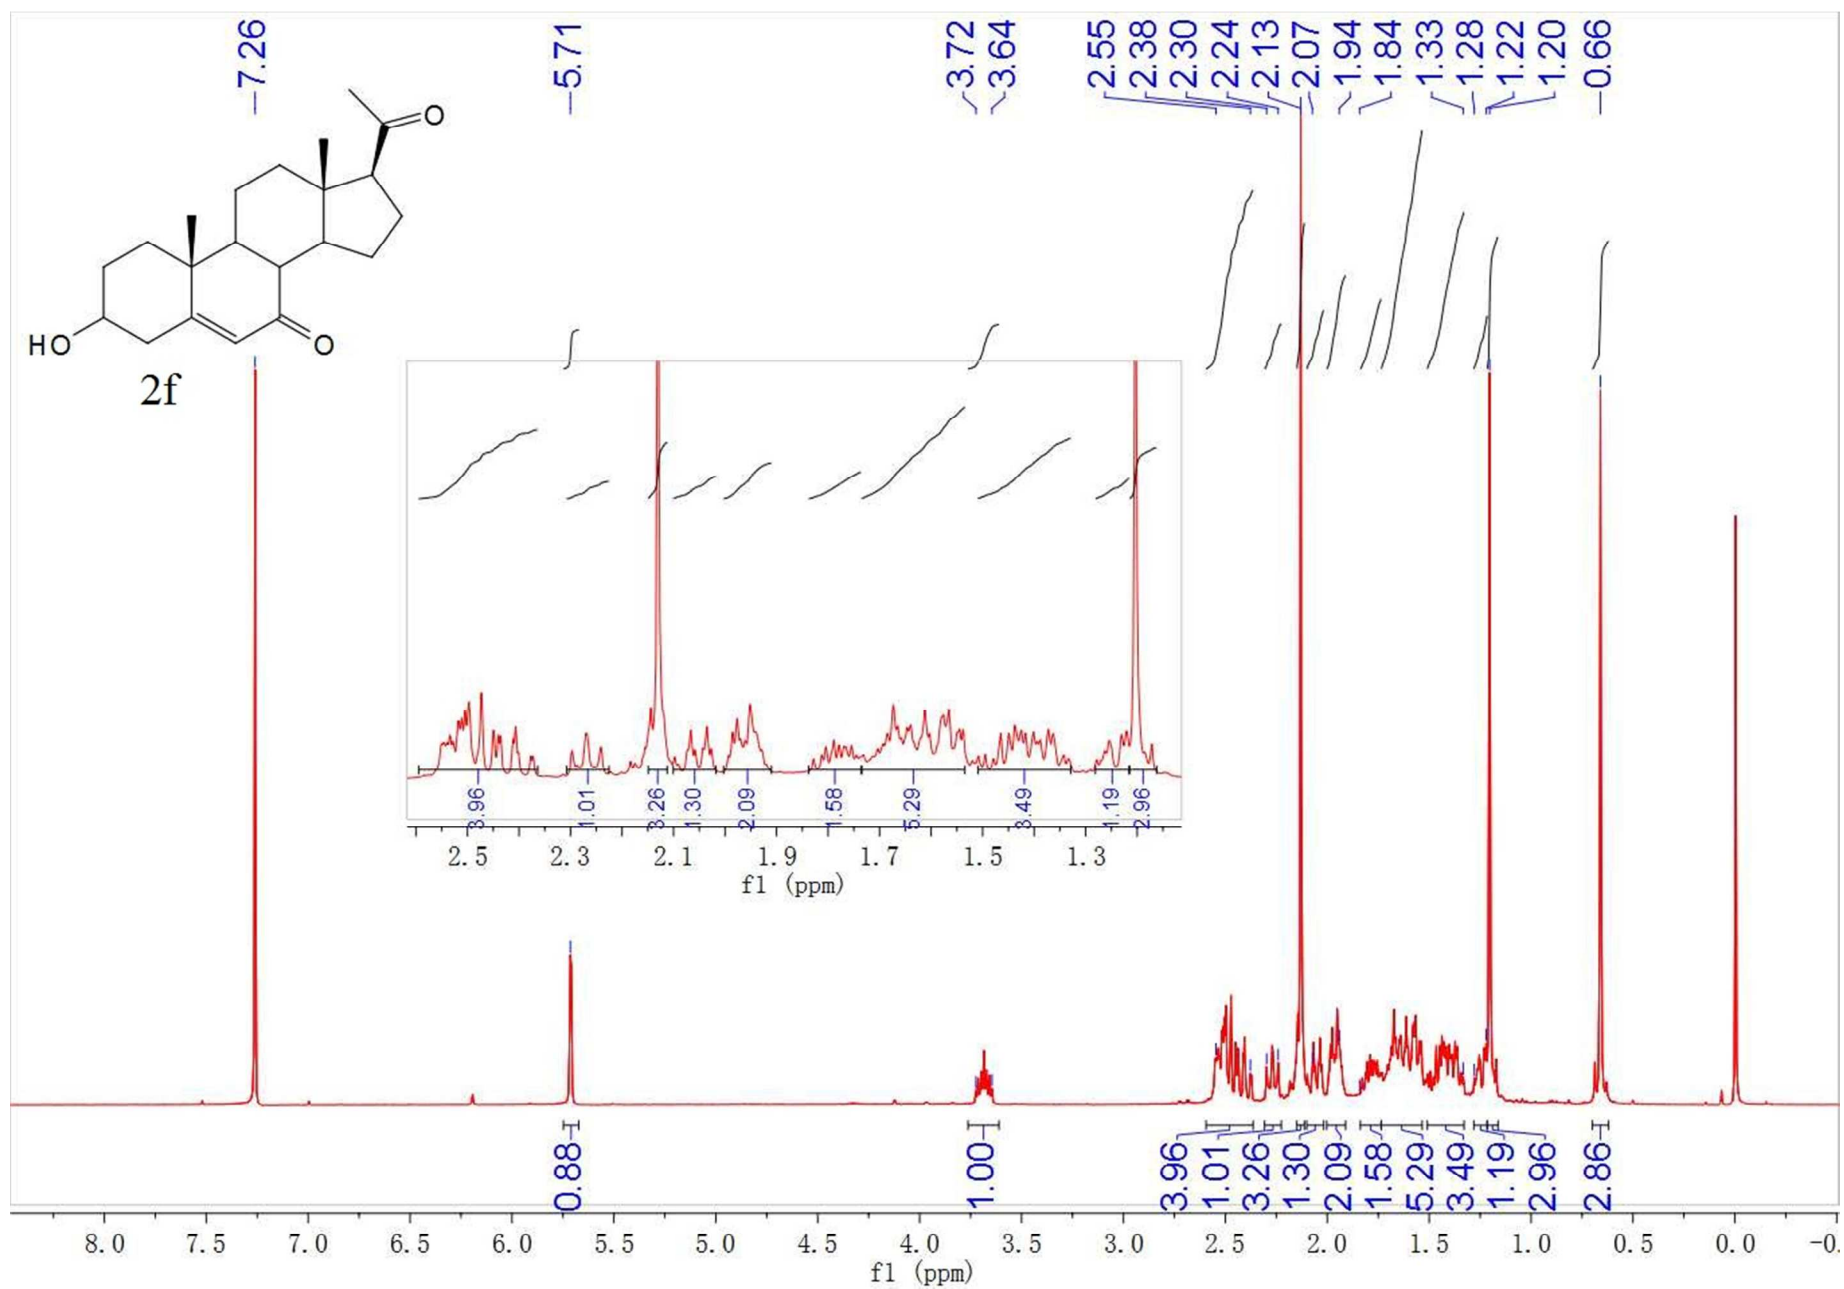

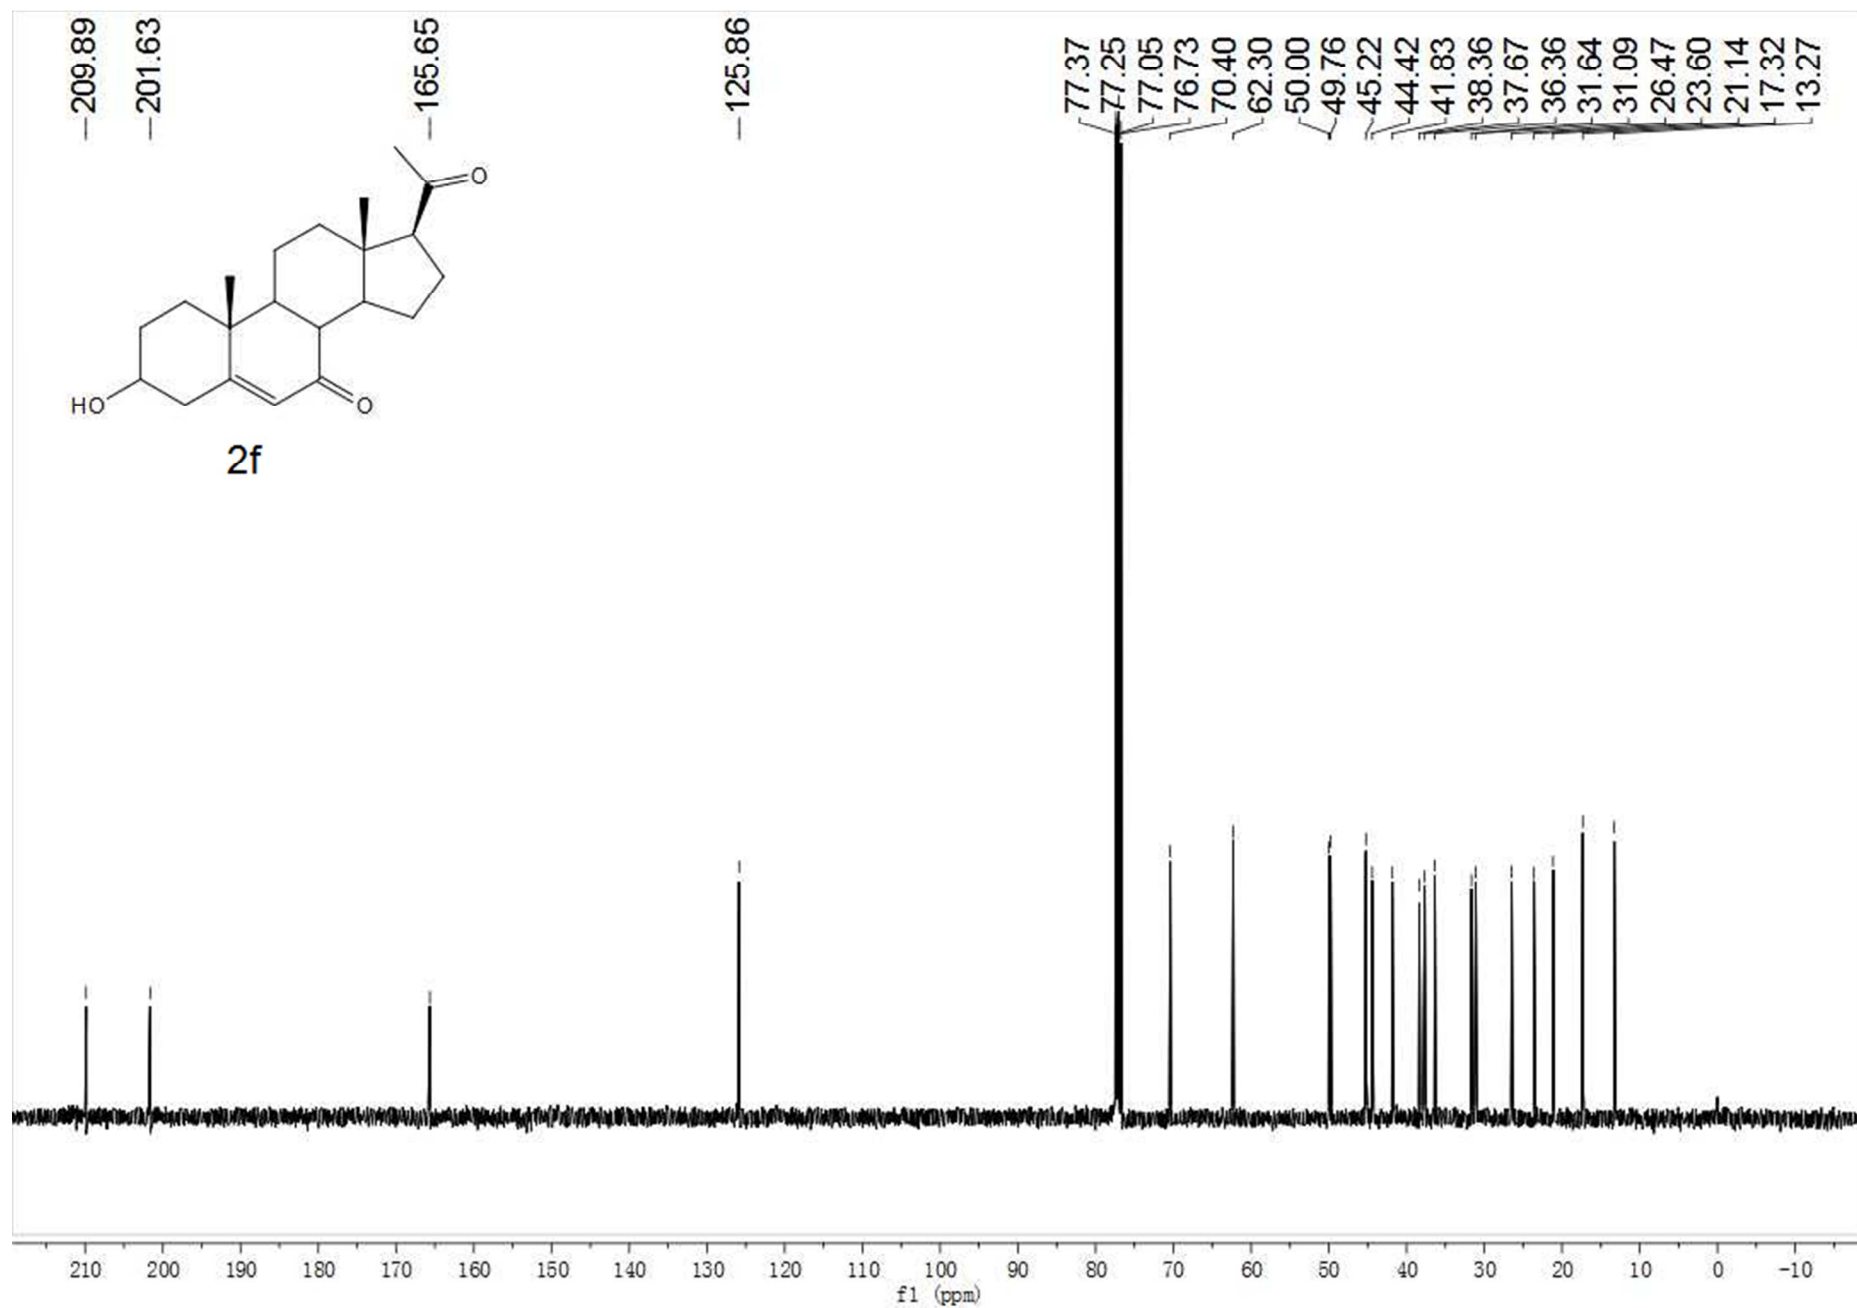



Chemical structure of compound **2g** is shown in the top left. The  $^1\text{H}$  NMR spectrum (CDCl<sub>3</sub>) is displayed below, with the x-axis labeled f1 (ppm) ranging from -0.5 to 8.5. The spectrum shows several peaks, with integration values provided for specific regions. The chemical structure of **2g** is a complex polycyclic molecule with a ketone and a silyl ether group.

Integration values for the main spectrum (from left to right): 0.90, 1.00, 2.41, 1.12, 1.07, 3.45, 1.49, 2.45, 2.93, 3.32, 3.00, 6.26, 3.53, 8.98, 3.02, 3.05, 2.89, 5.96.

Integration values for the inset spectrum (from left to right): 2.41, 1.12, 1.07, 3.45, 1.49, 2.45, 2.93, 3.32, 3.00, 6.26.

Chemical shift values (ppm) for the main spectrum (from left to right): 7.26, 5.66, 3.64, 3.56, 2.42, 2.37, 1.57, 1.23, 1.18, 1.16, 1.07, 0.93, 0.91, 0.89, 0.87, 0.87, 0.86, 0.85, 0.66.

Chemical shift values (ppm) for the inset spectrum (from left to right): 2.4, 2.2, 2.0, 1.8, 1.6, 1.4, 1.2.

Peak assignments: H<sub>2</sub>O (around 3.3 ppm), H<sub>2</sub>O (around 1.5 ppm).



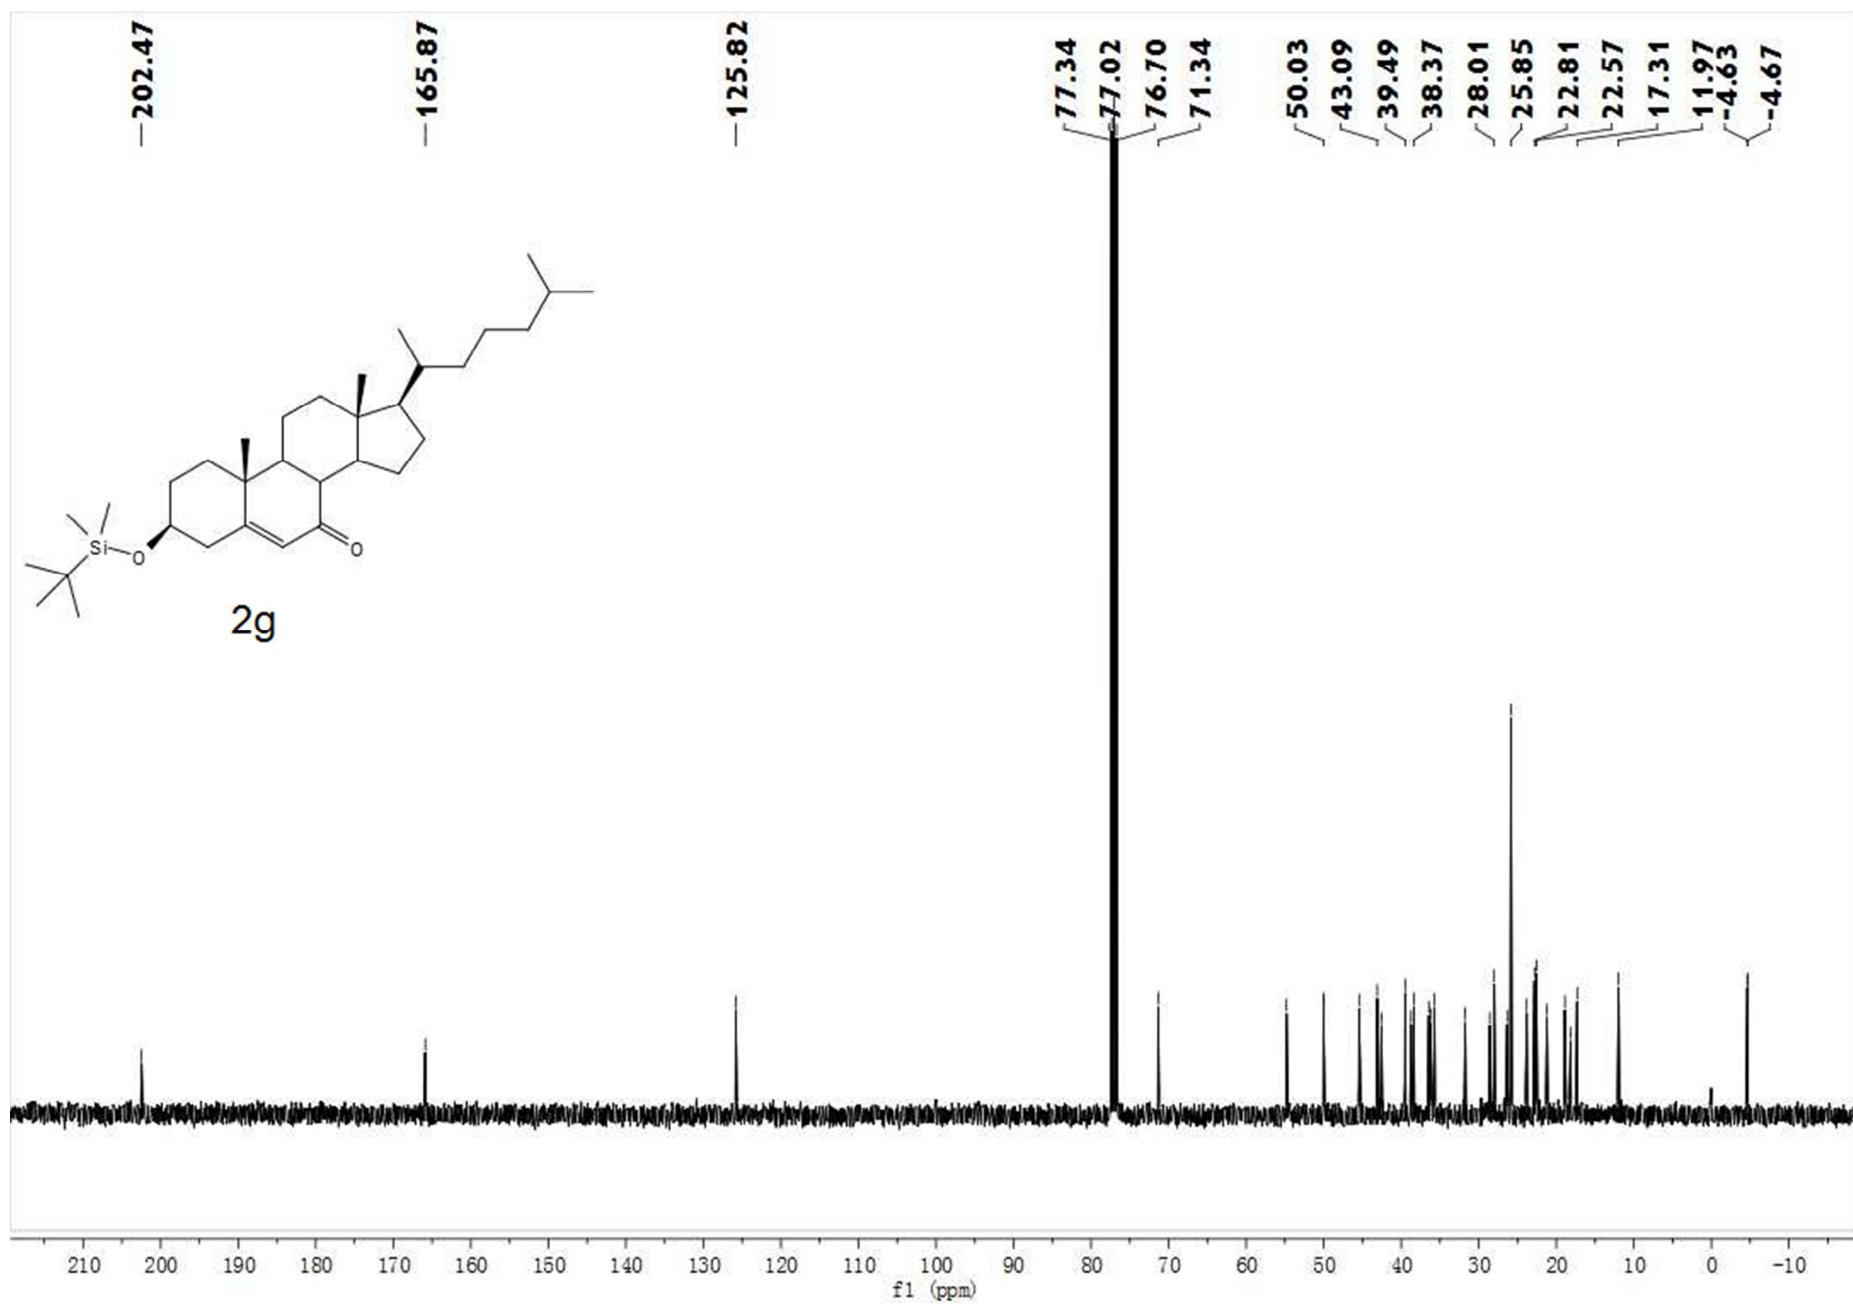

$^1\text{H}$  NMR and  $^{13}\text{C}$  NMR of **4a**.

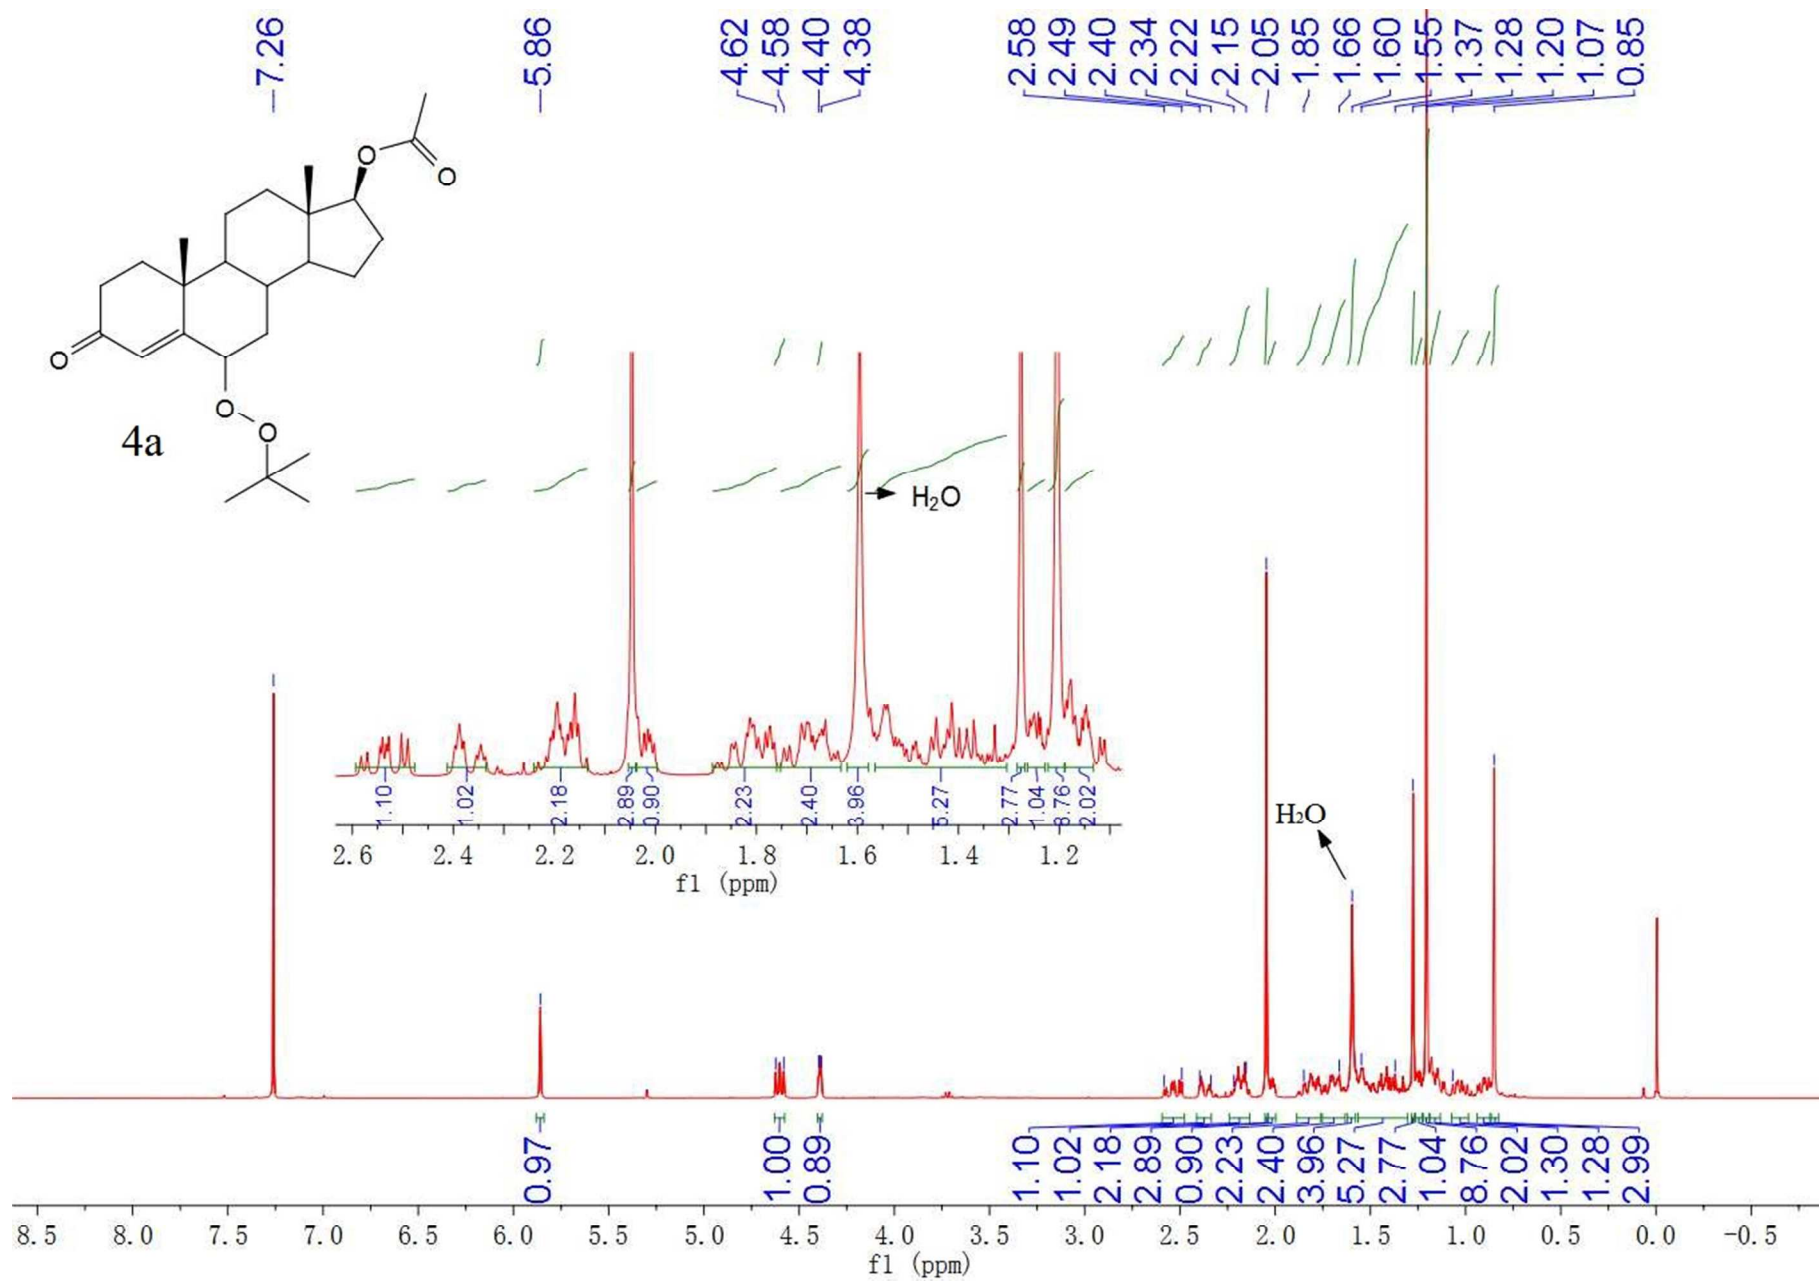

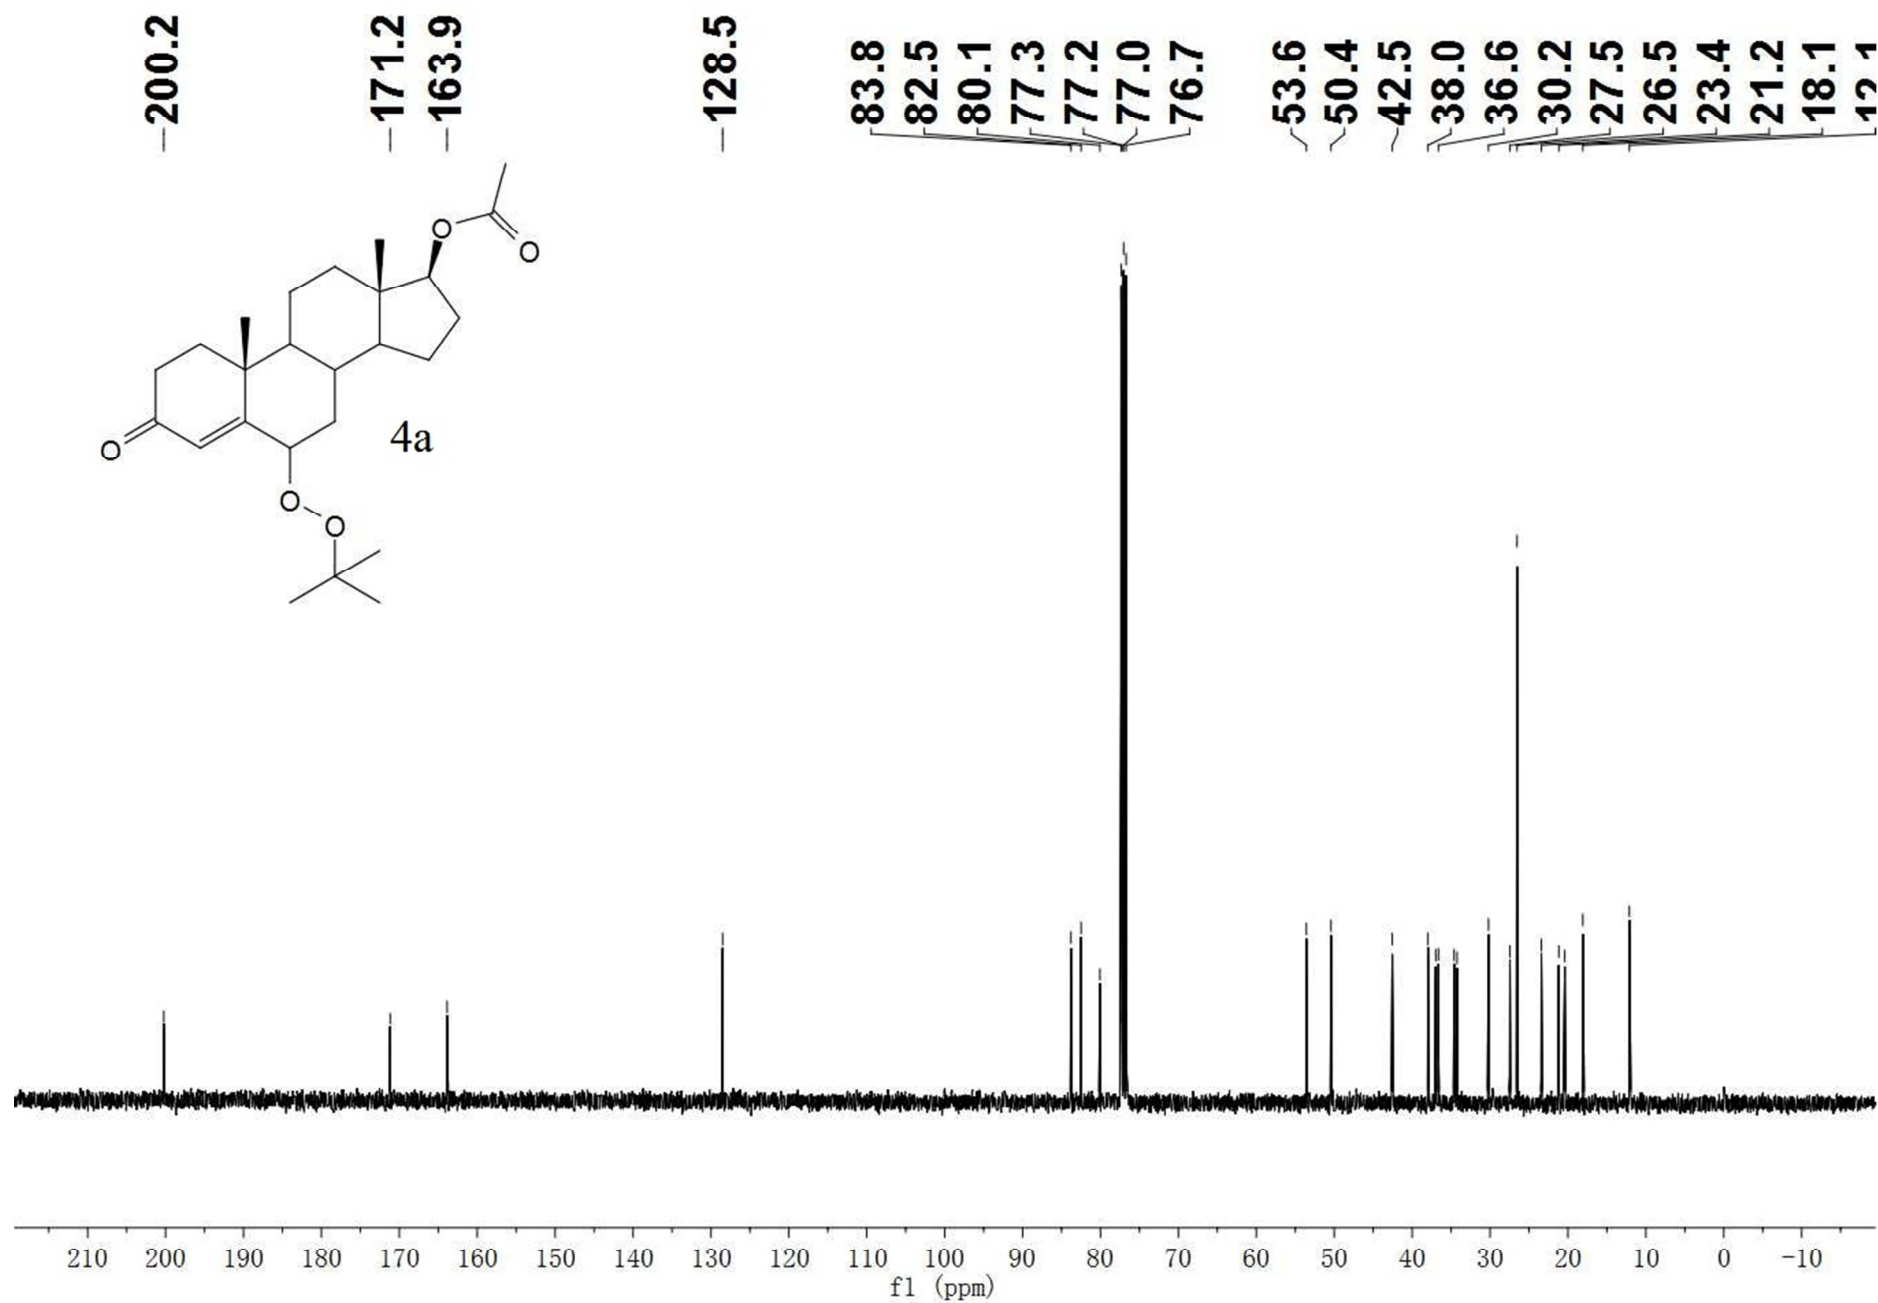

$^1\text{H}$  NMR and  $^{13}\text{C}$  NMR of **4b**.

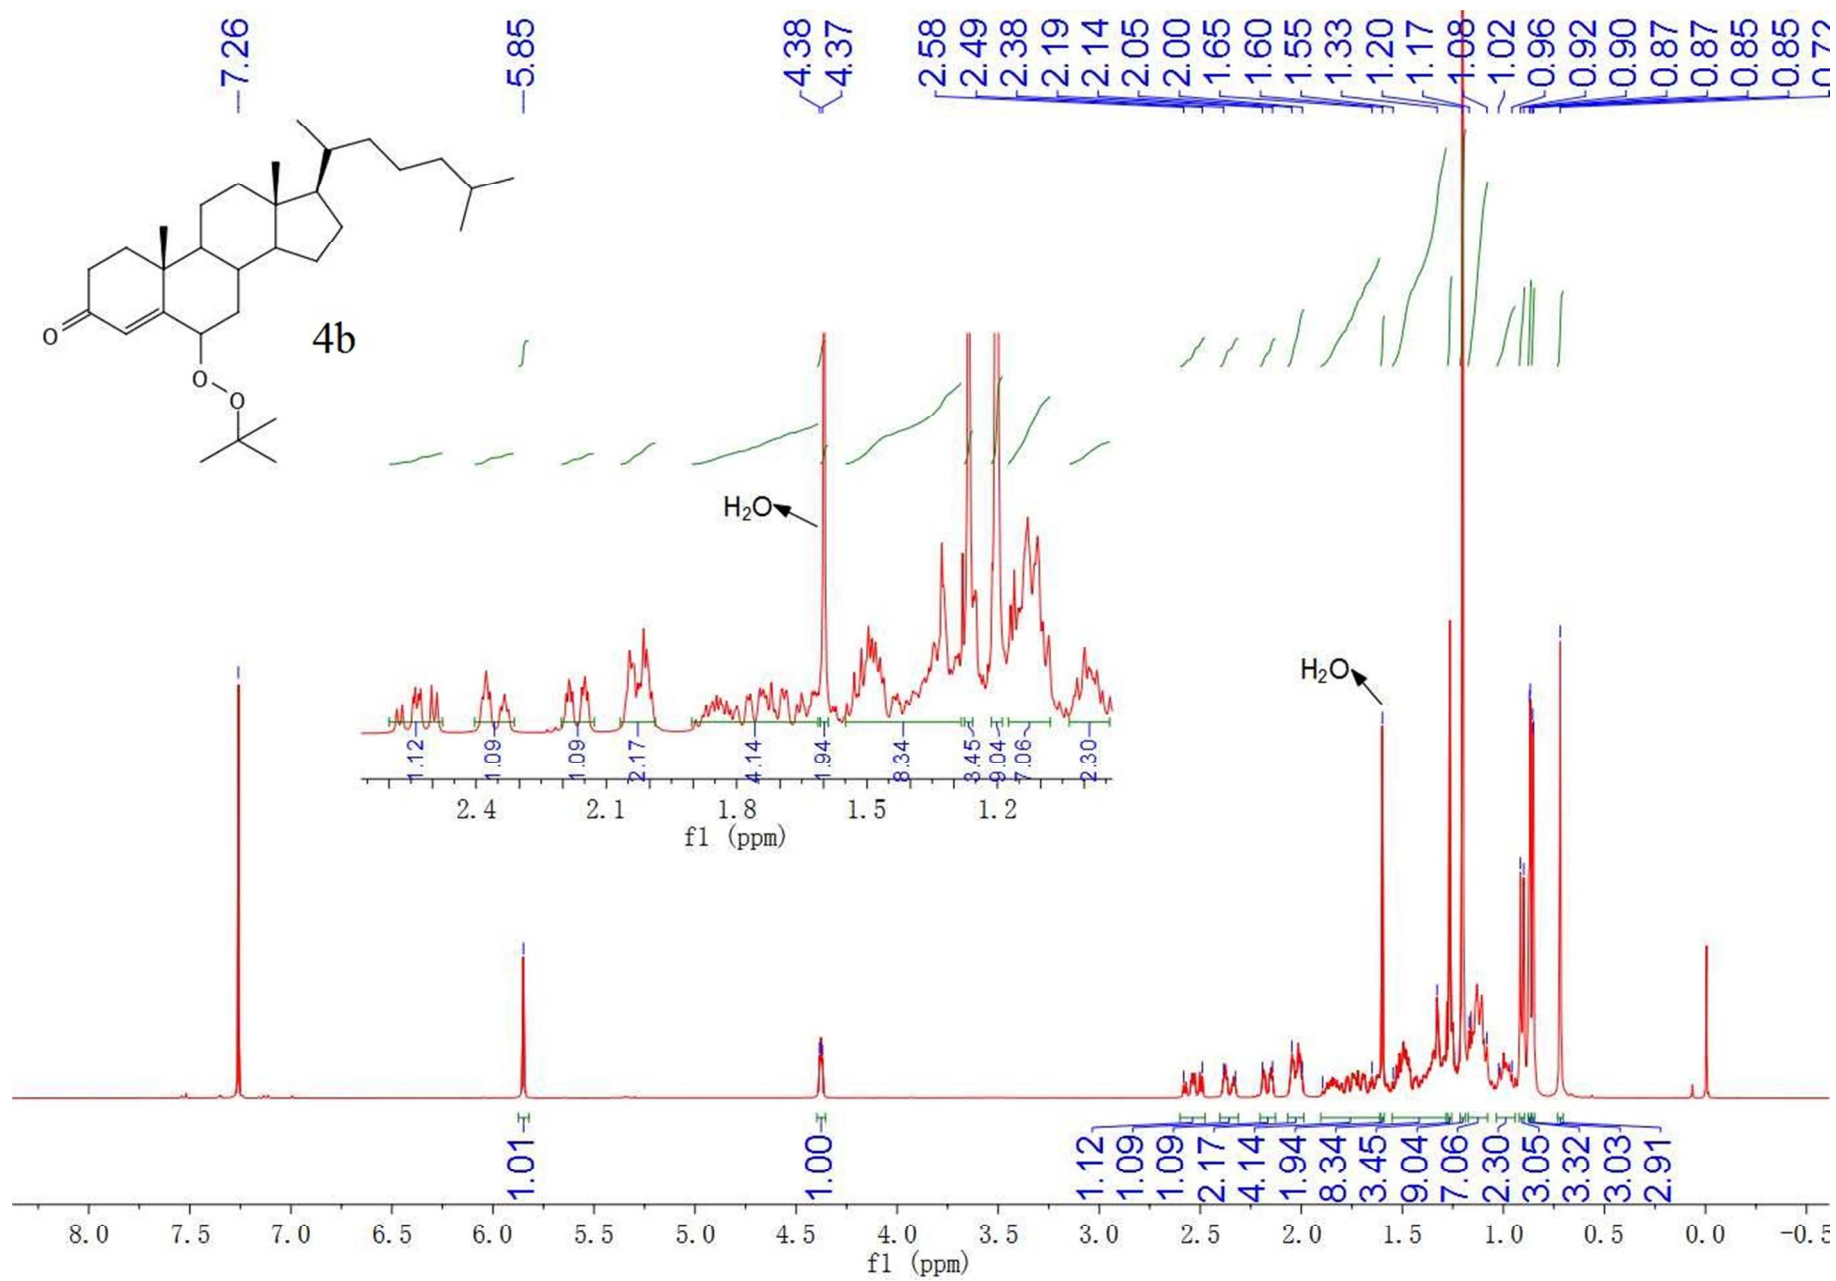

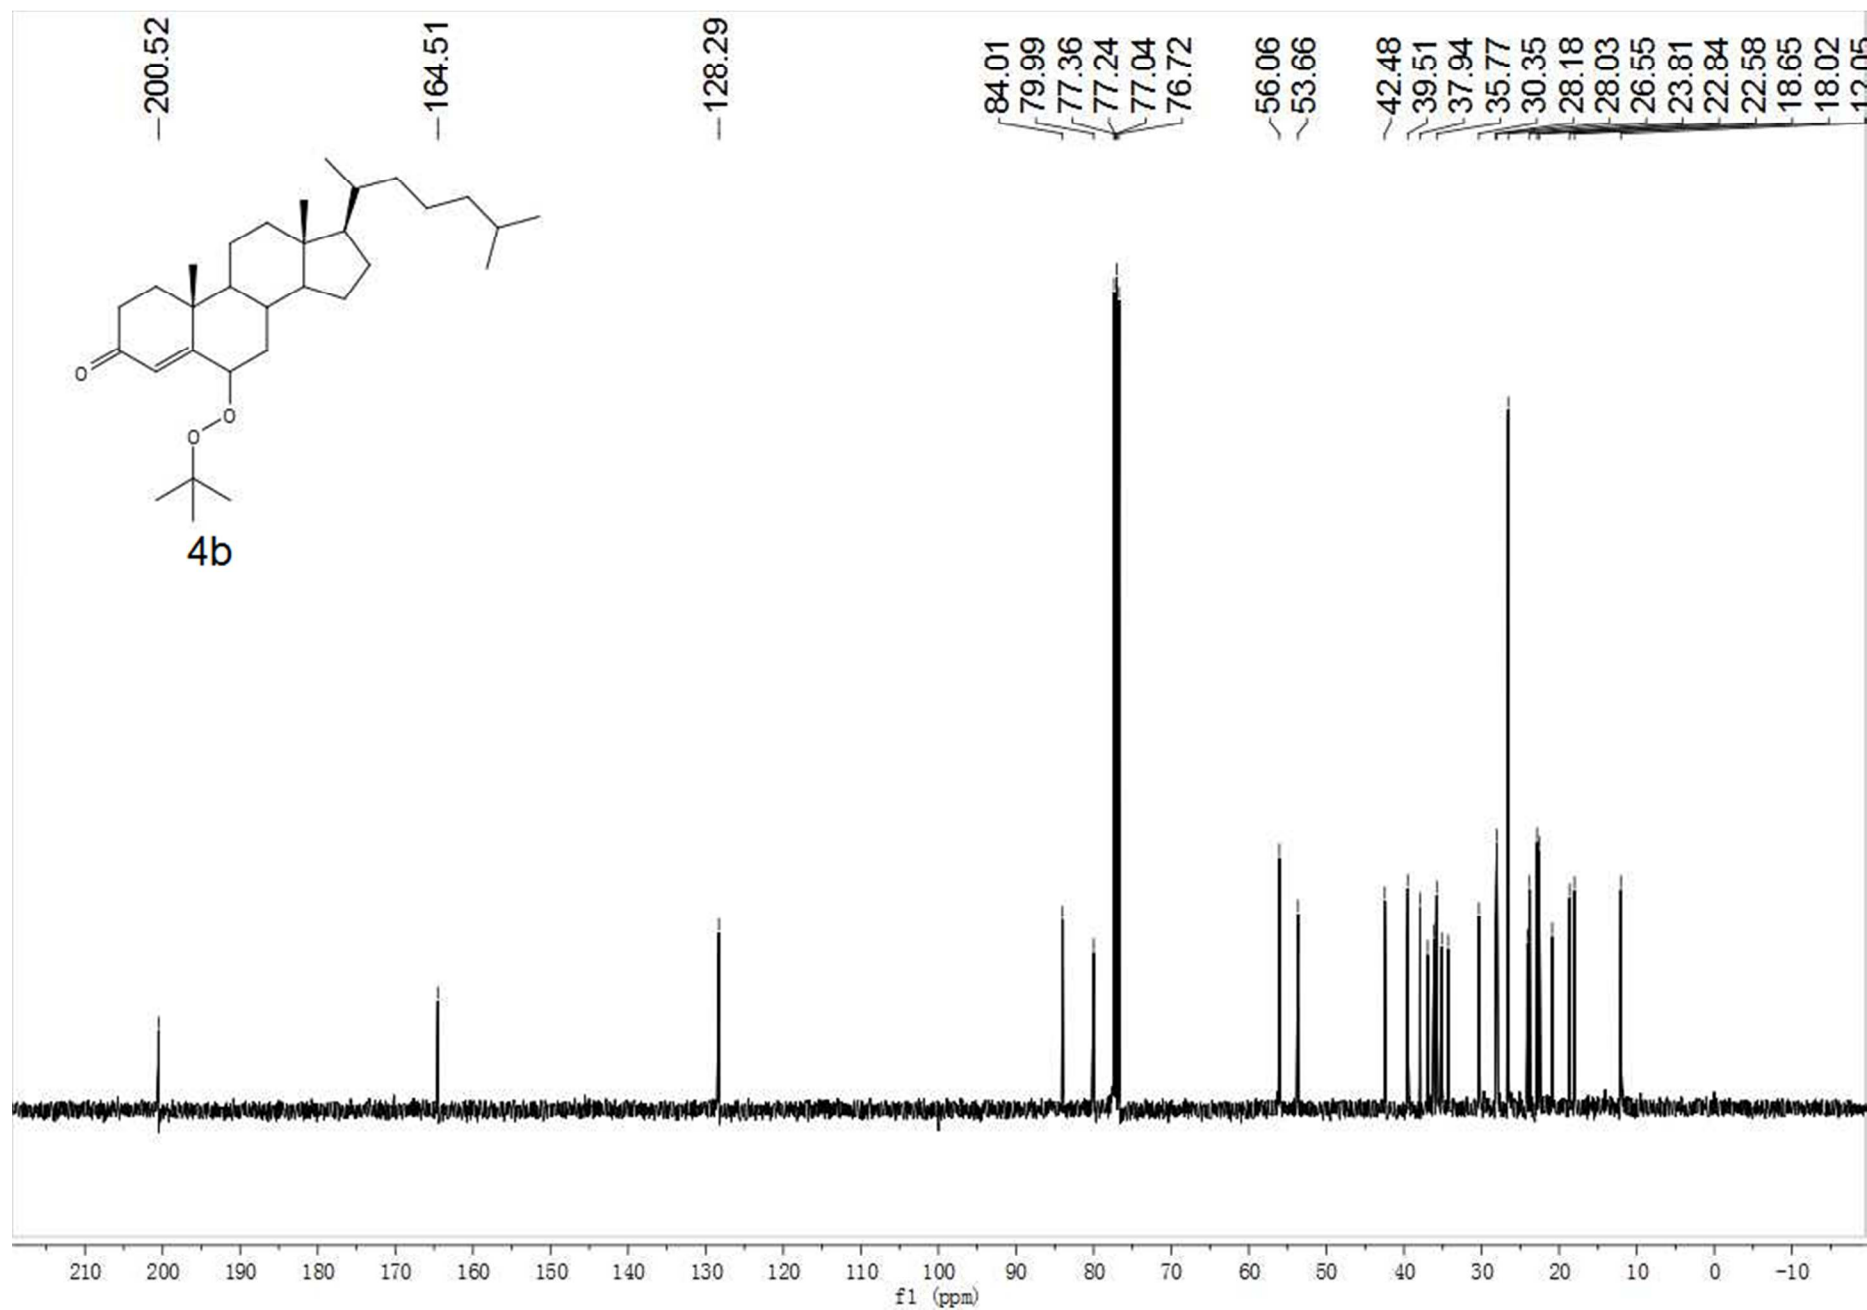

$^1\text{H}$  NMR and  $^{13}\text{C}$  NMR of **4c**.

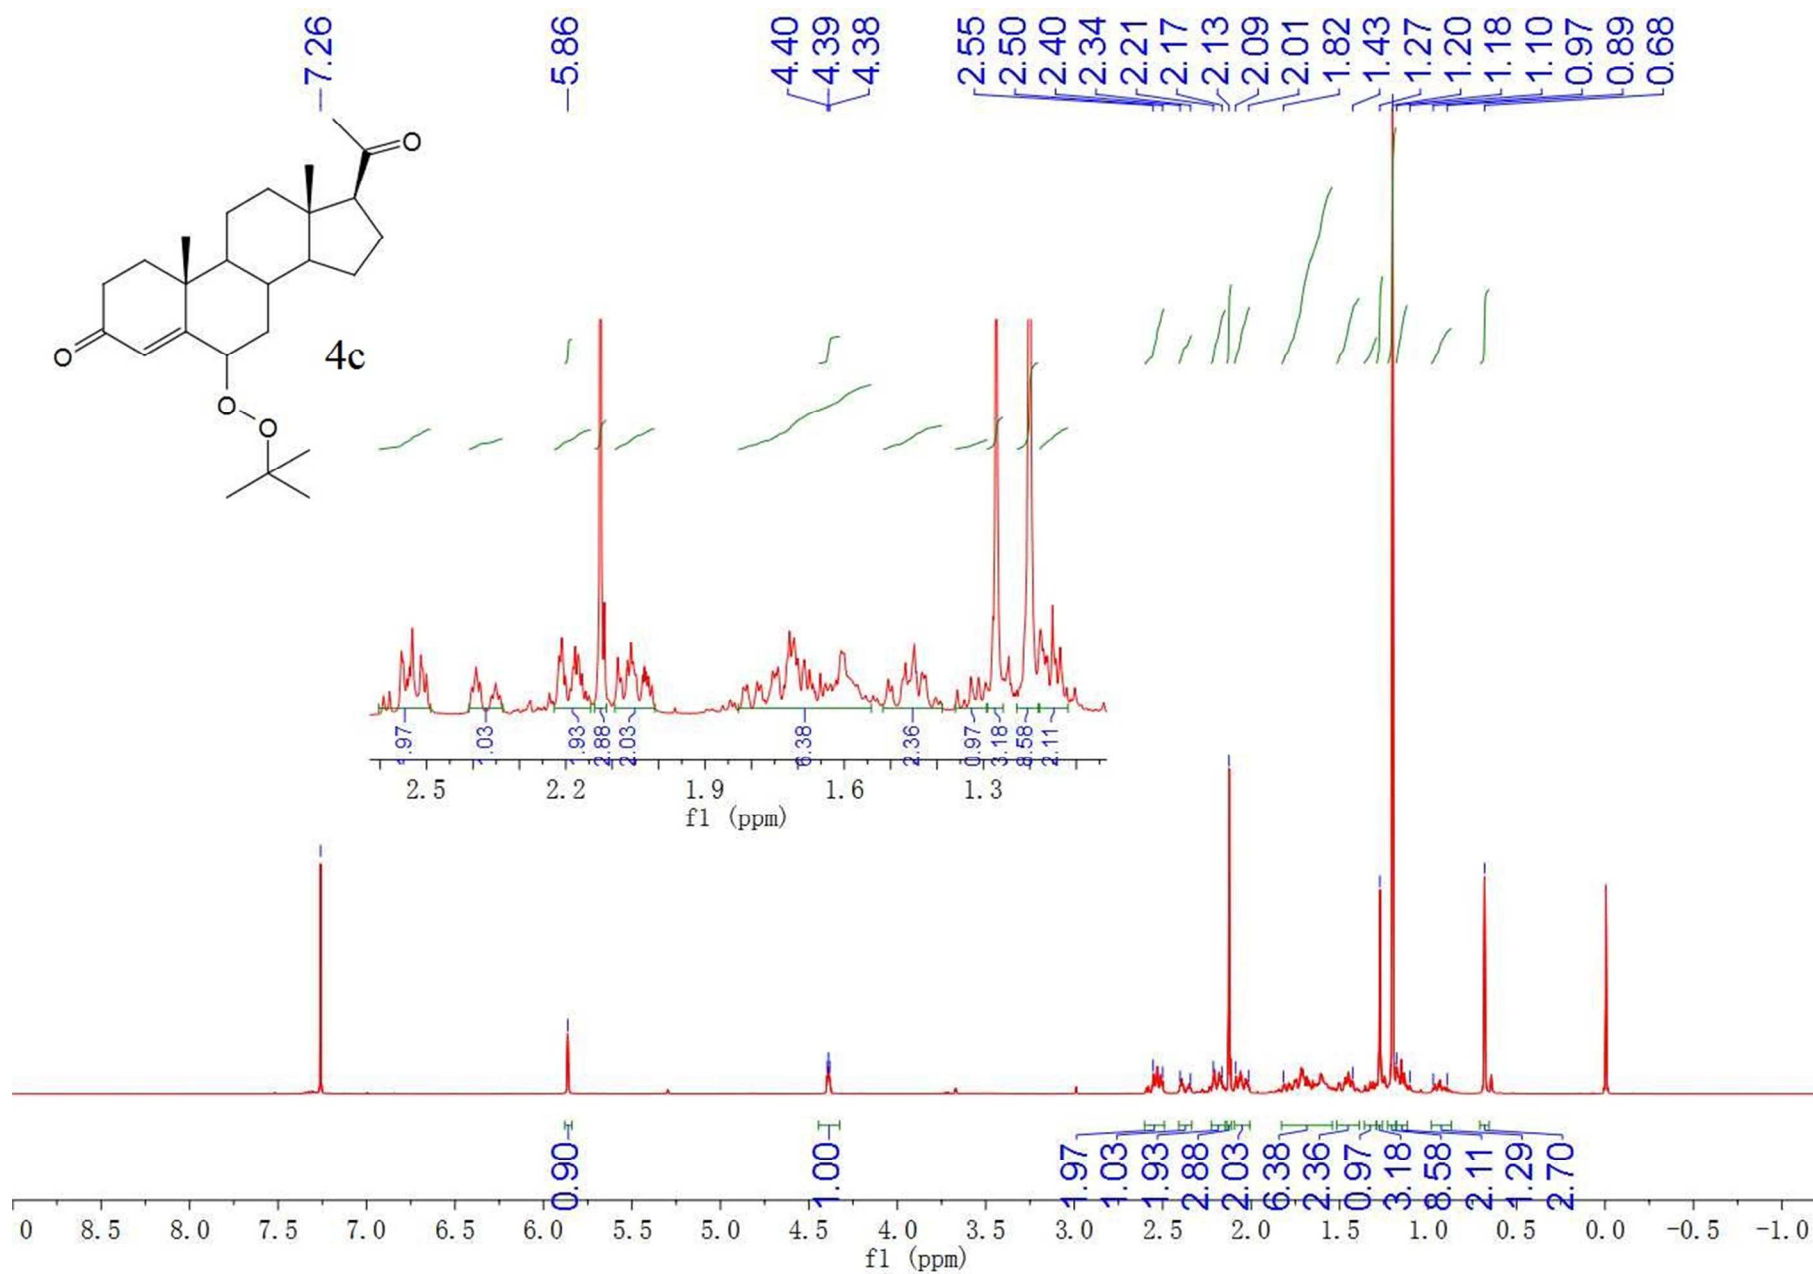



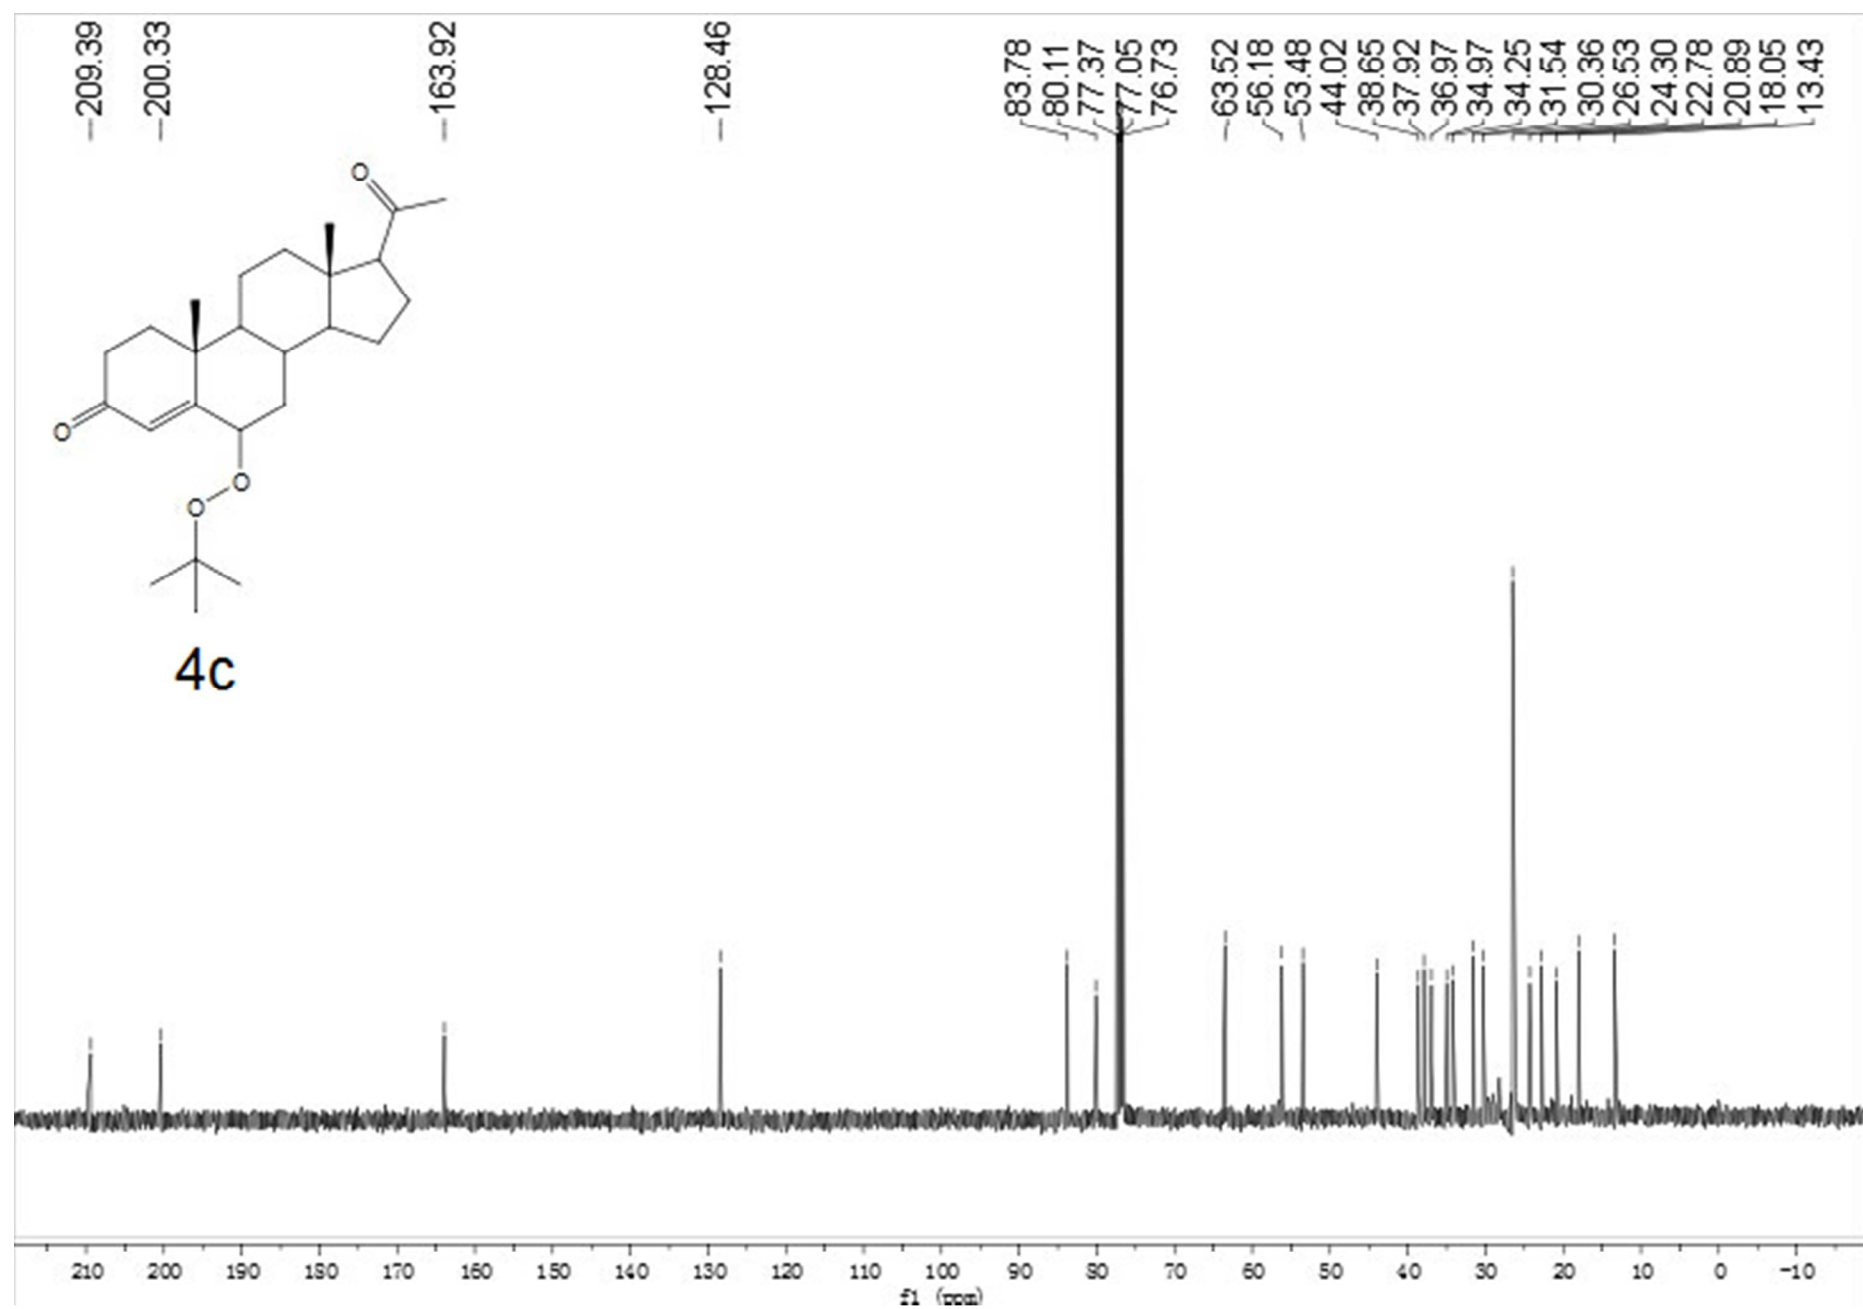

$^1\text{H}$  NMR and  $^{13}\text{C}$  NMR of **5a**.

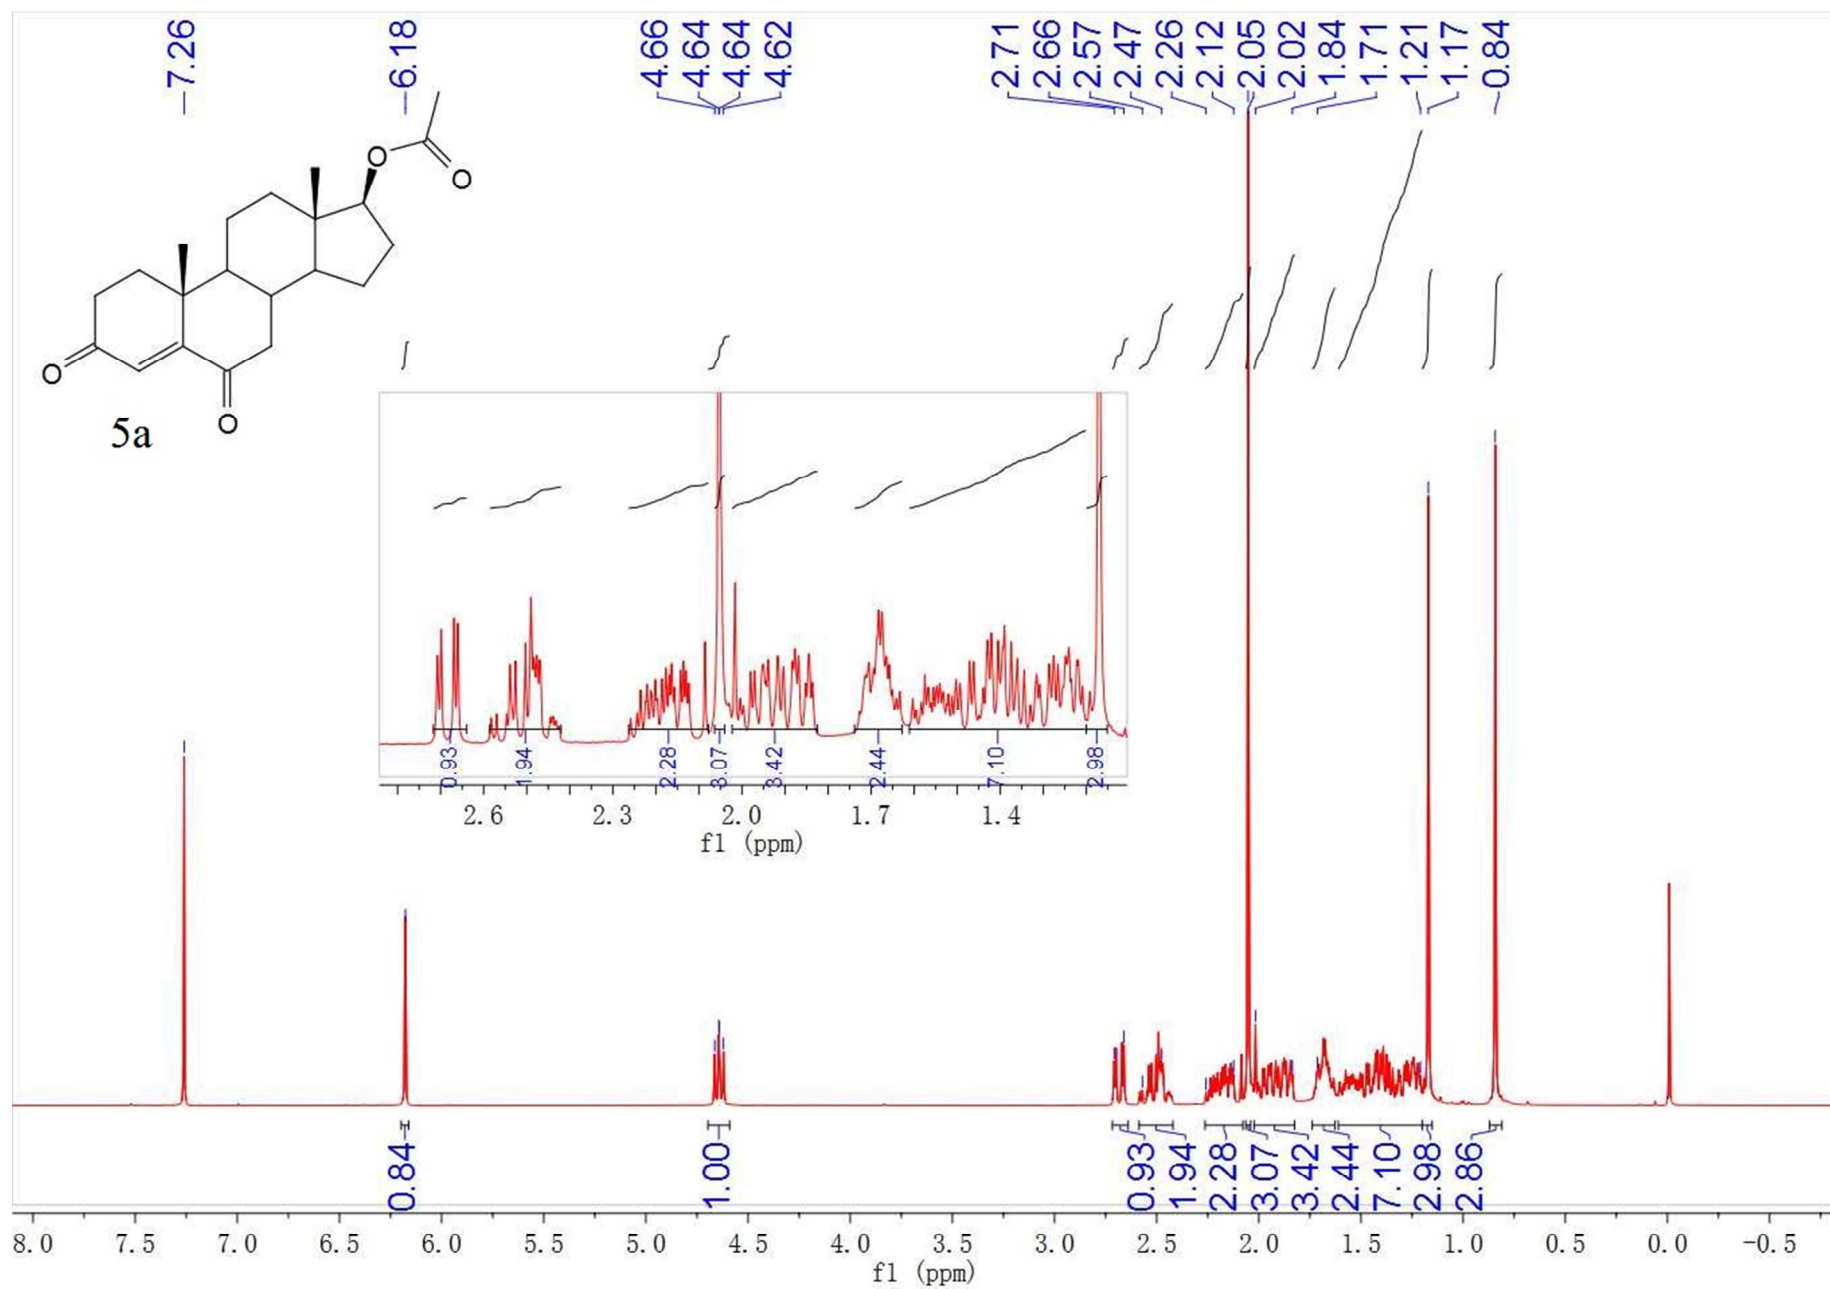



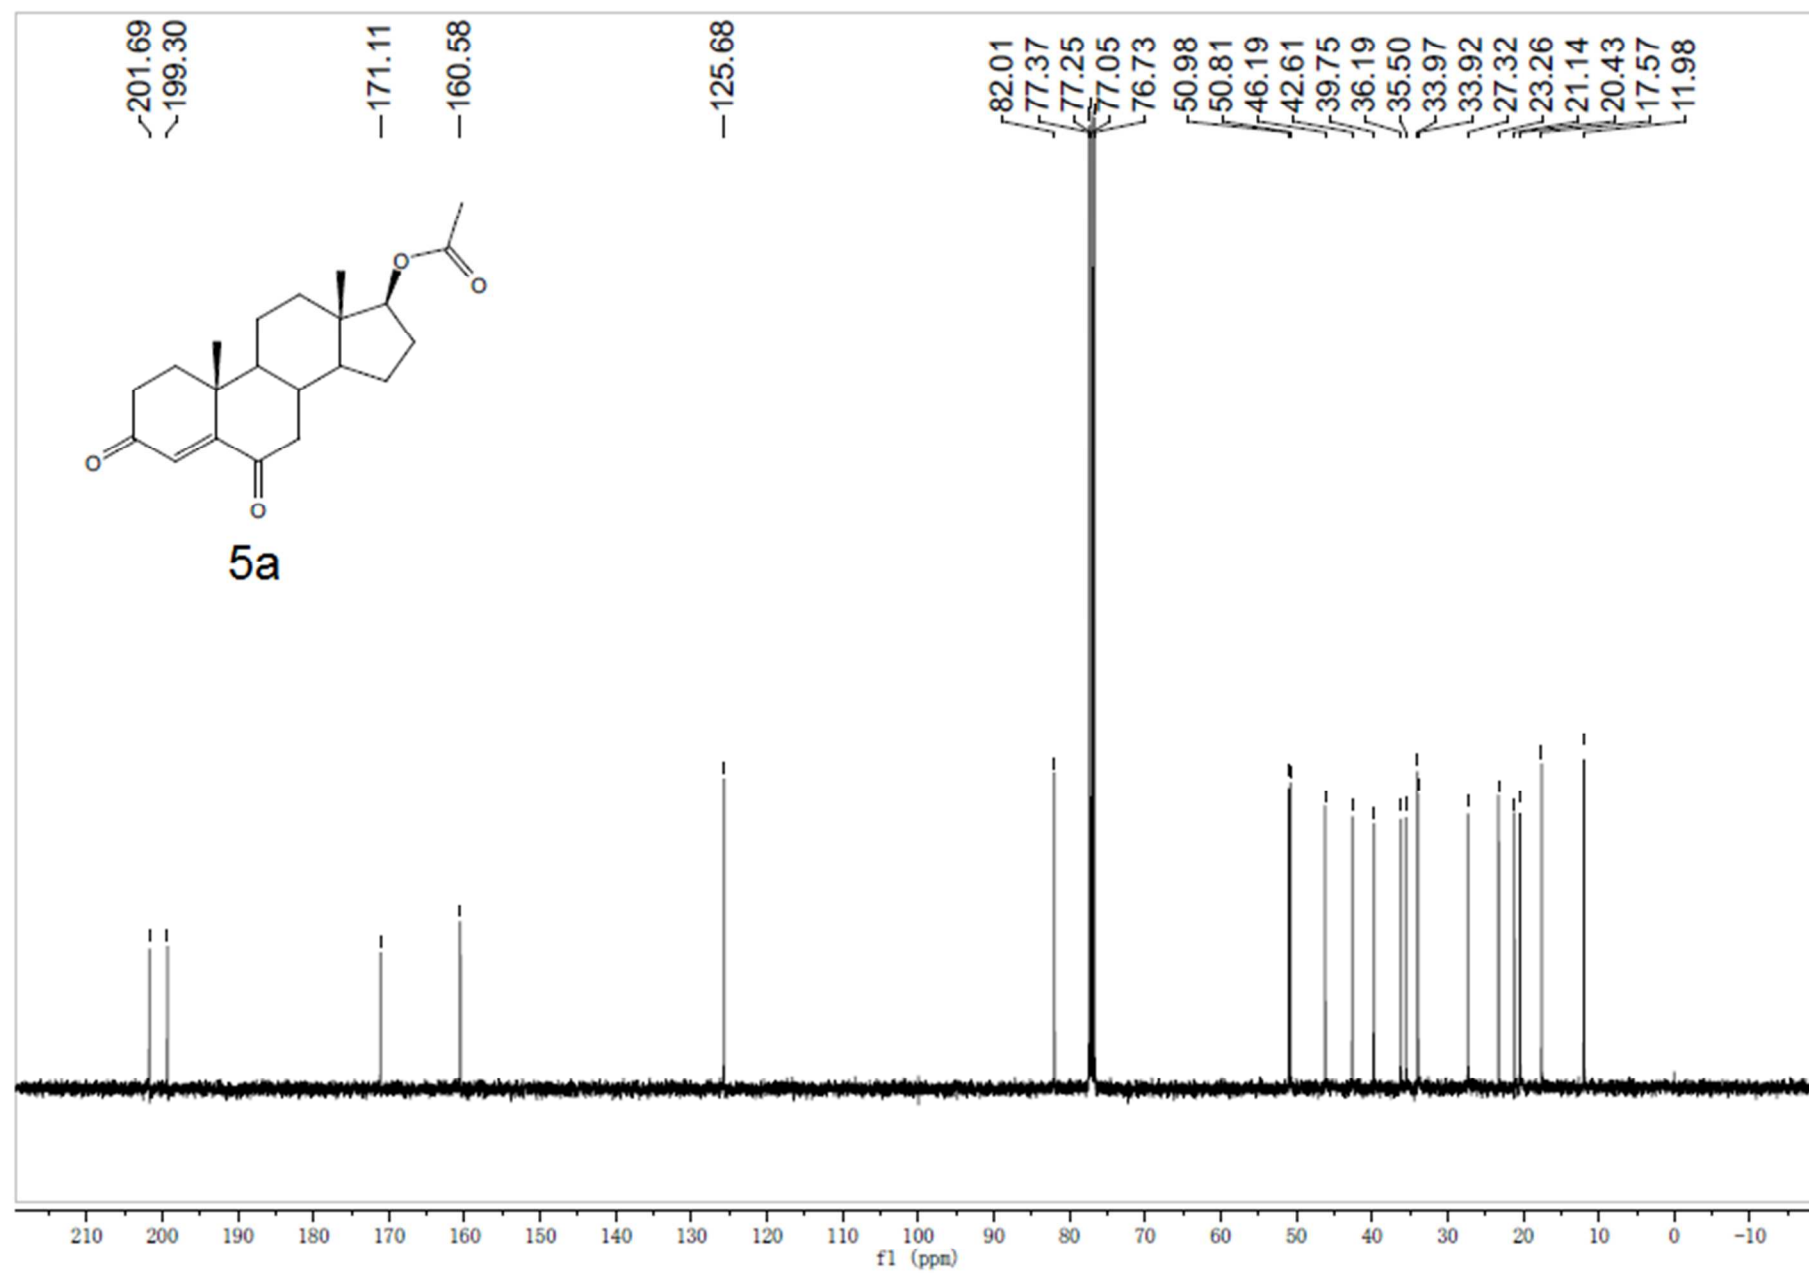

$^1\text{H}$  NMR and  $^{13}\text{C}$  NMR of **5b**.

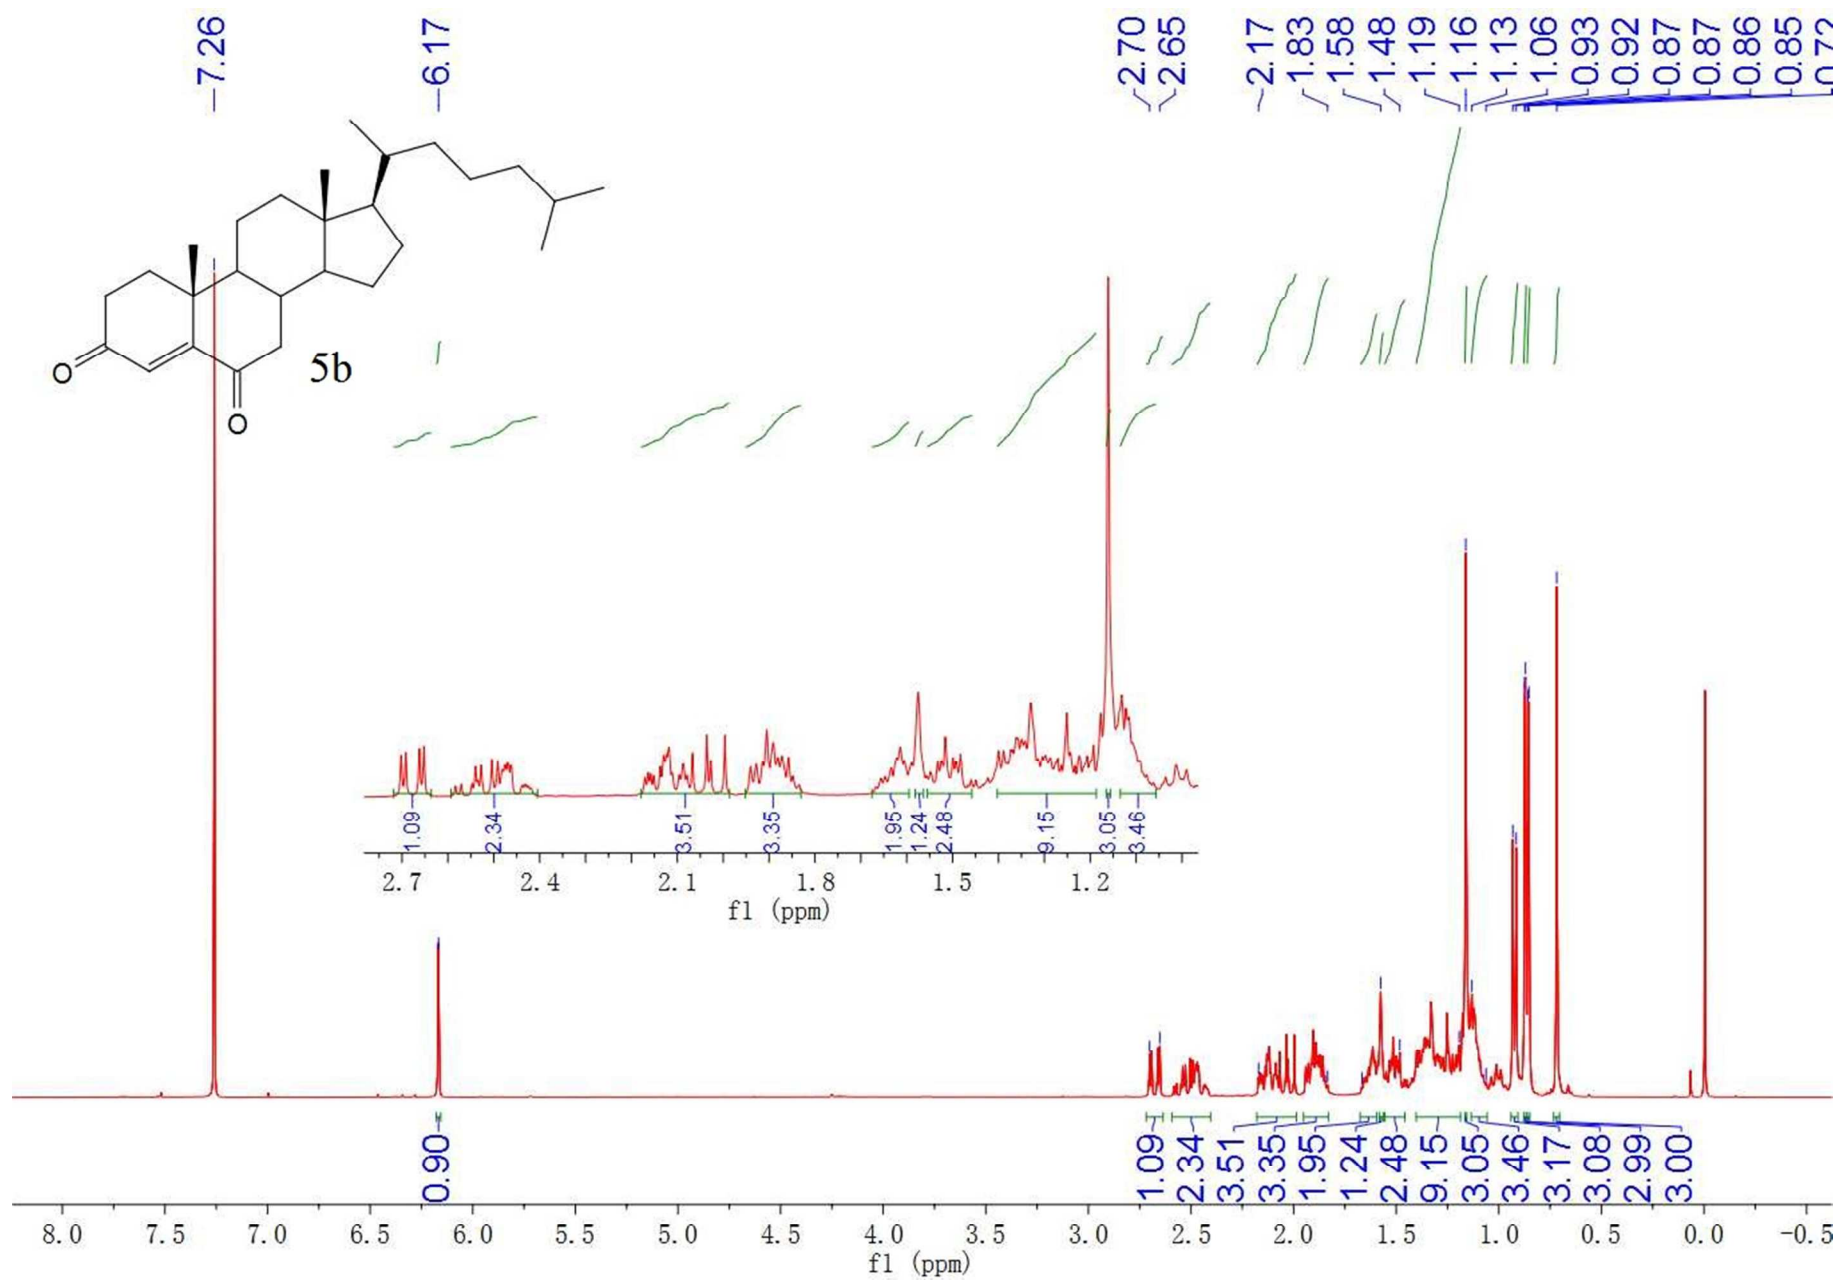

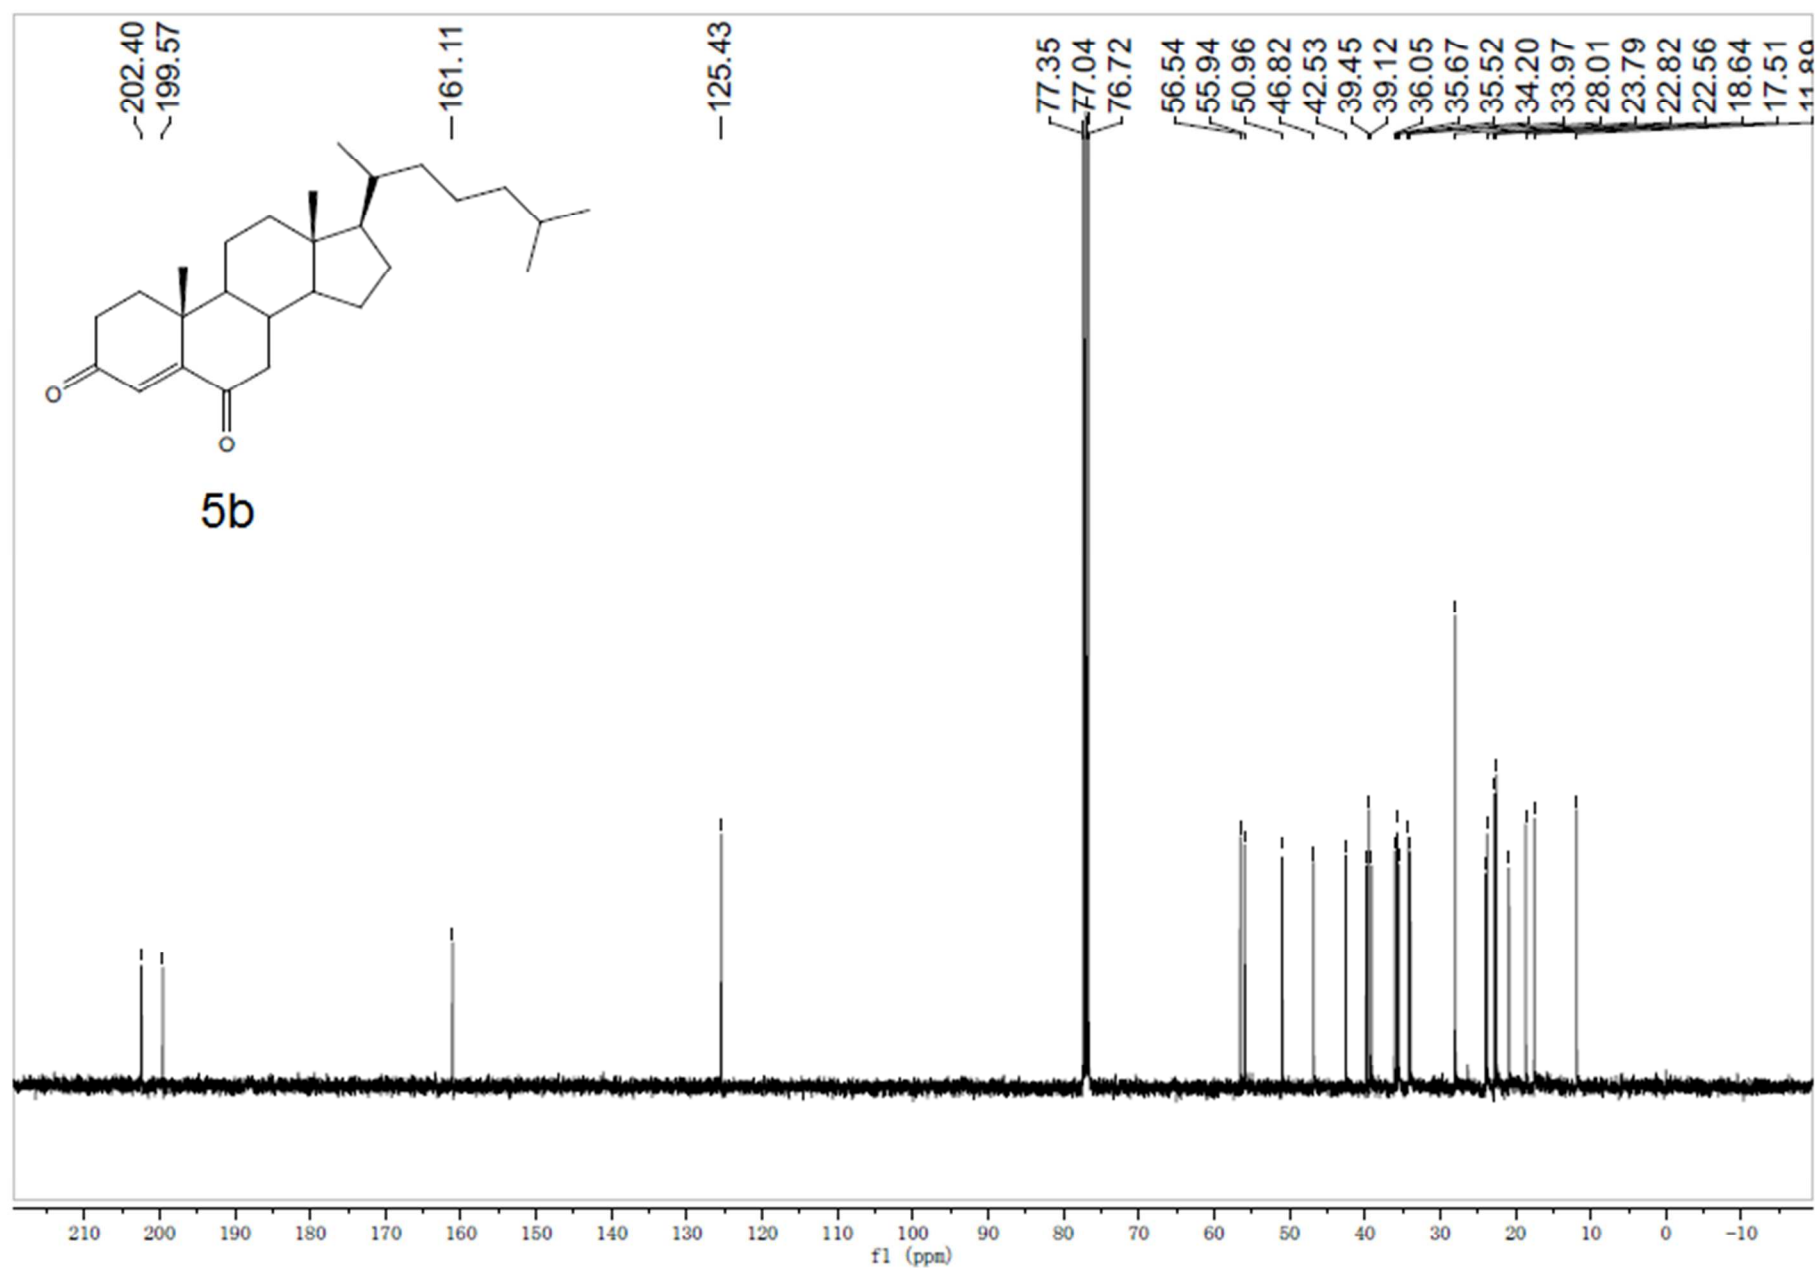

Chemical structure of **5c** is shown in the top left. The  $^1\text{H}$  NMR spectrum (CDCl<sub>3</sub>) is displayed below, with chemical shifts (ppm) labeled at the top and integration values at the bottom.

Chemical shifts (ppm): 7.26, 6.19, 2.72, 2.43, 2.25, 2.15, 2.14, 2.10, 2.03, 1.98, 1.88, 1.79, 1.68, 1.56, 1.22, 1.17, 0.68.

Integration values: 1.00, 3.15, 1.97, 3.30, 1.40, 2.14, 3.08, 4.11, 2.13, 3.04, 3.11.

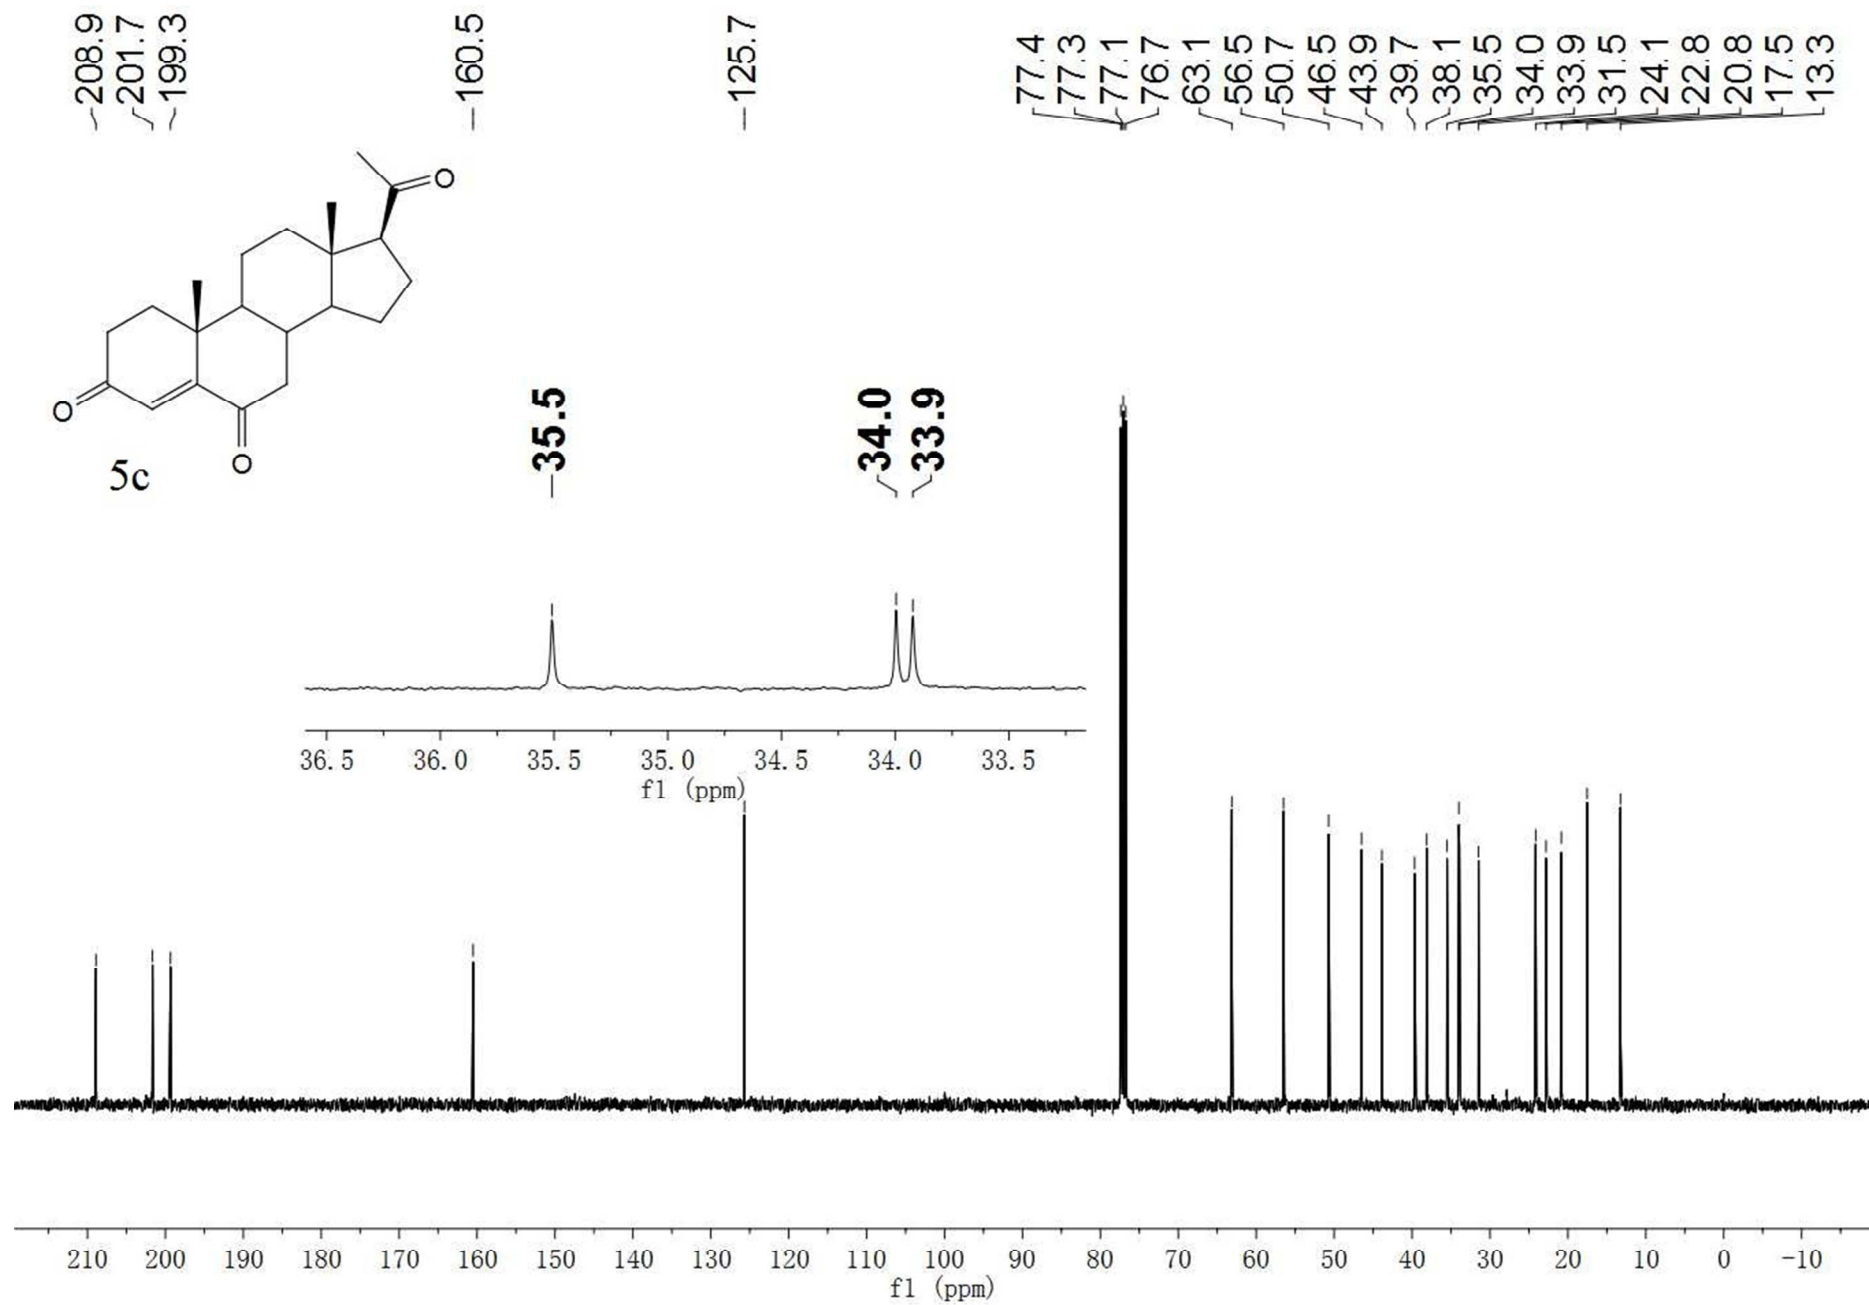

Supplement: Supplementary file 1 [file 8201393]
